# Supplementary material for: Lipid-Based Nutrient Supplementation Increases High-Density Lipoprotein (HDL) Cholesterol Efflux Capacity and Is Associated with Changes in the HDL Glycoproteome in Children
Source: PubMed Central journal article supplement (PMC8638293; doi:10.1021/acsomega.1c04811), 2021-11-18
Supplement: ao1c04811_si_001.pdf [file ao1c04811_si_001.pdf]

**Lipid-Based Nutrient Supplementation Increases HDL Cholesterol Efflux Capacity and is Associated with Changes in the HDL Glycoproteome in Children**

Brian V. Hong<sup>a</sup>, Chenghao Zhu<sup>a</sup>, Maurice Wong<sup>b</sup>, Romina Sacchi<sup>a</sup>, Christopher H. Rhodes<sup>a</sup>, Jea Woo Kang<sup>a</sup>, Charles D. Arnold<sup>a</sup>, Seth Adu-Afarwuah<sup>c</sup>, Anna Lartey<sup>c</sup>, Brietta M. Oaks<sup>d</sup>, Carlito B. Lebrilla<sup>b</sup>, Kathryn G. Dewey<sup>a</sup>, Angela M. Zivkovic<sup>a\*</sup>

<sup>a</sup>*Department of Nutrition and* <sup>b</sup>*Chemistry, University of California, Davis, Davis, CA, USA;*

<sup>c</sup>*Department of Nutrition and Food Science, University of Ghana, Legon, Ghana;* <sup>d</sup>*Department of Nutrition and Food Sciences, University of Rhode Island, Kingston, RI, USA*

\* To whom correspondence should be addressed.

E-mail: [amzivkovic@ucdavis.edu](mailto:amzivkovic@ucdavis.edu)

**Online Supporting Information:** Tables S1-6, Figure S1, Method S1-2

| <b>Table S1.</b> Lipid species relative mean abundance. |                         |            |           |
|---------------------------------------------------------|-------------------------|------------|-----------|
| Treatment                                               | Lipid Species (n = 313) | Mean (%)   | SD        |
| IFA                                                     | CE 16:1                 | 0.1378572  | 0.0604765 |
| IFA                                                     | CE 18:1                 | 2.6030622  | 0.75991   |
| IFA                                                     | CE 18:2                 | 16.2803028 | 3.5456791 |
| IFA                                                     | CE 18:3                 | 0.1464146  | 0.0369396 |
| IFA                                                     | CE 20:3                 | 0.2330877  | 0.0856682 |
| IFA                                                     | CE 20:4                 | 1.8760629  | 0.6399473 |
| IFA                                                     | CE 20:5                 | 0.387712   | 0.2444259 |
| IFA                                                     | CE 22:6                 | 0.6374623  | 0.1987288 |
| IFA                                                     | Ceramide 42:2 d         | 0.0043721  | 0.0018045 |
| IFA                                                     | Cholesterol             | 7.853734   | 1.2850934 |
| IFA                                                     | DG 32:1                 | 0.0345559  | 0.0189325 |
| IFA                                                     | DG 34:1                 | 0.1713322  | 0.0858138 |
| IFA                                                     | DG 34:2                 | 0.1330312  | 0.0666908 |
| IFA                                                     | DG 34:3                 | 0.0088923  | 0.0065974 |
| IFA                                                     | DG 36:1                 | 0.0247751  | 0.0138689 |
| IFA                                                     | DG 36:2                 | 0.1829097  | 0.0884051 |
| IFA                                                     | DG 36:3                 | 0.2134531  | 0.0900126 |
| IFA                                                     | DG 36:4 A               | 0.0370132  | 0.0209697 |
| IFA                                                     | DG 38:5                 | 0.0368875  | 0.0142032 |
| IFA                                                     | DG 38:6                 | 0.0246981  | 0.0115721 |
| IFA                                                     | GlcCer 40:1 d           | 0.0058233  | 0.0016308 |
| IFA                                                     | GlcCer 42:1 d           | 0.0099992  | 0.0024896 |
| IFA                                                     | GlcCer 42:2 d           | 0.0102188  | 0.0031231 |
| IFA                                                     | Gal-Gal-Cer 42:2 d      | 0.0009613  | 0.0003257 |
| IFA                                                     | LPC 20:0                | 0.0017111  | 0.0010692 |
| IFA                                                     | LPC 20:1                | 0.0010695  | 0.000808  |
| IFA                                                     | LPC 22:4                | 0.0013012  | 0.0009683 |
| IFA                                                     | LPC 22:6                | 0.0027707  | 0.0016736 |
| IFA                                                     | LPC 16:0 o              | 0.0044347  | 0.0043819 |
| IFA                                                     | LPC 16:0 p              | 0.0030814  | 0.0023026 |
| IFA                                                     | LPC 16:0                | 0.0521558  | 0.0339188 |
| IFA                                                     | LPC 18:0                | 0.0933325  | 0.0812941 |
| IFA                                                     | LPC 18:2                | 0.004914   | 0.002191  |
| IFA                                                     | LPC 20:3                | 0.0008577  | 0.0005119 |
| IFA                                                     | LPC 20:4                | 0.0038756  | 0.0017815 |
| IFA                                                     | LPC 20:5                | 0.0005545  | 0.0004261 |
| IFA                                                     | PC 25:0                 | 0.0056509  | 0.003086  |
| IFA                                                     | PC 37:3                 | 0.0070631  | 0.0020255 |
| IFA                                                     | PC 39:6                 | 0.0186046  | 0.0098897 |
| IFA                                                     | PC 42:5                 | 0.0032337  | 0.0012247 |

|     |           |           |           |
|-----|-----------|-----------|-----------|
| IFA | PC 42:6   | 0.001678  | 0.0011308 |
| IFA | PC 32:0 p | 0.0331638 | 0.0085406 |
| IFA | PC 36:3 p | 0.2746408 | 0.0721579 |
| IFA | PC 38:2 p | 0.0073635 | 0.0019078 |
| IFA | PC 42:3 p | 0.0074855 | 0.0017851 |
| IFA | PC 34:1   | 0.0625206 | 0.0131247 |
| IFA | PC 36:3   | 0.0763789 | 0.0168516 |
| IFA | PC 36:5   | 0.631321  | 0.1060358 |
| IFA | PC 38:4   | 0.035043  | 0.012812  |
| IFA | PC 40:6   | 0.0257932 | 0.0092326 |
| IFA | PC 28:0   | 0.0052521 | 0.0039004 |
| IFA | PC 30:0   | 0.1326906 | 0.0752787 |
| IFA | PC 31:0   | 0.0031081 | 0.001485  |
| IFA | PC 32:0   | 0.1684637 | 0.0460285 |
| IFA | PC 32:1   | 0.1883644 | 0.1053984 |
| IFA | PC 33:0   | 0.0048116 | 0.0019503 |
| IFA | PC 33:1   | 0.026403  | 0.0113446 |
| IFA | PC 33:2   | 0.0258754 | 0.0093034 |
| IFA | PC 34:0   | 0.0315977 | 0.0103688 |
| IFA | PC 34:1.1 | 5.8217695 | 1.7982886 |
| IFA | PC 34:2   | 12.73141  | 1.8240495 |
| IFA | PC 34:3   | 0.02341   | 0.0157101 |
| IFA | PC 35:1   | 0.0265742 | 0.0080173 |
| IFA | PC 35:2   | 0.0621283 | 0.0299071 |
| IFA | PC 35:3   | 0.0155381 | 0.0065739 |
| IFA | PC 35:4   | 0.0072446 | 0.0019098 |
| IFA | PC 36:1   | 0.6186497 | 0.2206464 |
| IFA | PC 36:2   | 5.9438642 | 1.4155724 |
| IFA | PC 36:3.1 | 1.0766842 | 0.3876907 |
| IFA | PC 36:3.2 | 1.145882  | 0.3222141 |
| IFA | PC 36:4   | 0.2463351 | 0.1274005 |
| IFA | PC 36:4.1 | 0.0833027 | 0.0404342 |
| IFA | PC 36:5.1 | 0.0103022 | 0.0179414 |
| IFA | PC 36:6   | 0.0132486 | 0.0075397 |
| IFA | PC 37:4   | 0.0189128 | 0.0105022 |
| IFA | PC 37:6   | 0.0065841 | 0.0021936 |
| IFA | PC 38:2   | 0.0401641 | 0.0088659 |
| IFA | PC 38:3   | 0.3974327 | 0.1247121 |
| IFA | PC 38:4.1 | 0.0863833 | 0.0339879 |
| IFA | PC 38:5   | 0.6184815 | 0.167185  |
| IFA | PC 38:5.1 | 0.2949042 | 0.1473133 |
| IFA | PC 38:6   | 7.1234569 | 1.5630188 |
| IFA | PC 38:7   | 0.0066066 | 0.0029699 |

|     |             |           |           |
|-----|-------------|-----------|-----------|
| IFA | PC 40:4     | 0.0253843 | 0.0090688 |
| IFA | PC 40:5     | 0.2499824 | 0.0757798 |
| IFA | PC 40:5.1   | 0.0333164 | 0.0131165 |
| IFA | PC 40:6.1   | 1.1147742 | 0.3396461 |
| IFA | PC 40:7     | 0.0089394 | 0.0311764 |
| IFA | PC 40:8     | 0.0146751 | 0.0043687 |
| IFA | PC 32:0 o   | 0.0275527 | 0.0086761 |
| IFA | PC 34:0 o   | 0.0027981 | 0.0009148 |
| IFA | PC 32:1 p   | 0.0061988 | 0.0024647 |
| IFA | PC 34:1 p   | 0.0788858 | 0.0274006 |
| IFA | PC 34:2 p   | 0.1204576 | 0.0295573 |
| IFA | PC 36:1 p   | 0.0041282 | 0.0010508 |
| IFA | PC 36:2 p   | 0.0153018 | 0.0035698 |
| IFA | PC 36:4 p   | 0.3511014 | 0.106525  |
| IFA | PC 38:3 p   | 0.081097  | 0.0204898 |
| IFA | PC 38:4 p   | 0.2806301 | 0.0864274 |
| IFA | PC 38:4 p.1 | 0.0503431 | 0.0153801 |
| IFA | PC 38:5 p   | 0.1342734 | 0.0422402 |
| IFA | PC 40:3 p   | 0.0121976 | 0.0030706 |
| IFA | PC 40:4 p   | 0.0214711 | 0.0055188 |
| IFA | PC 40:5 p   | 0.0368656 | 0.0113642 |
| IFA | PC 40:6 p   | 0.0971024 | 0.0354183 |
| IFA | PC 40:6 p.1 | 0.0334665 | 0.009923  |
| IFA | PC 42:5 p   | 0.0065463 | 0.0025268 |
| IFA | PE 34:3     | 0.1146389 | 0.0599862 |
| IFA | PE 38:7     | 0.3375418 | 0.1415107 |
| IFA | PE 34:2     | 0.0919267 | 0.0620603 |
| IFA | PE 36:1     | 0.0300185 | 0.0232051 |
| IFA | PE 36:4     | 0.0843725 | 0.0622276 |
| IFA | PE 38:6     | 0.2139939 | 0.1331927 |
| IFA | PE 34:1 p   | 0.0425784 | 0.0184177 |
| IFA | PE 36:2 p   | 0.1046856 | 0.0617247 |
| IFA | PE 36:4 p   | 0.3991413 | 0.1958227 |
| IFA | PE 38:4 p   | 0.3761954 | 0.1745742 |
| IFA | PE 38:5 p   | 0.1951929 | 0.0875122 |
| IFA | PE 40:5 p   | 0.0485444 | 0.0215723 |
| IFA | SM 37:1 d   | 0.007616  | 0.0023158 |
| IFA | SM 38:0 d   | 0.0088763 | 0.0060071 |
| IFA | SM 39:2 d   | 0.0052143 | 0.0014382 |
| IFA | SM 42:0 d   | 0.0047196 | 0.0027203 |
| IFA | SM 44:2 d   | 0.004052  | 0.0021327 |
| IFA | SM 42:1 d   | 0.0310399 | 0.0213524 |
| IFA | SM 30:1 d   | 0.0069589 | 0.0043363 |

|     |           |           |           |
|-----|-----------|-----------|-----------|
| IFA | SM 32:0 d | 0.0039972 | 0.0028345 |
| IFA | SM 32:2 d | 0.0097454 | 0.0048926 |
| IFA | SM 34:0 d | 0.0624555 | 0.0215191 |
| IFA | SM 34:2 d | 0.1605549 | 0.0327618 |
| IFA | SM 36:0 d | 0.0315585 | 0.0254066 |
| IFA | SM 36:1 d | 0.2317237 | 0.0722986 |
| IFA | SM 36:2 d | 0.2964634 | 0.0623167 |
| IFA | SM 36:3 d | 0.0037257 | 0.0012834 |
| IFA | SM 38:1 d | 0.1294476 | 0.0353464 |
| IFA | SM 38:2 d | 0.0740422 | 0.0151675 |
| IFA | SM 40:0 d | 0.0128439 | 0.0073279 |
| IFA | SM 40:1 d | 0.2706064 | 0.06438   |
| IFA | SM 40:2 d | 0.139354  | 0.0274346 |
| IFA | SM 42:2 d | 0.6394989 | 0.2165979 |
| IFA | SM 42:3 d | 0.3308828 | 0.0801847 |
| IFA | SM 43:1 d | 0.0017848 | 0.0010368 |
| IFA | TG 52:4   | 0.0332697 | 0.0144661 |
| IFA | TG 40:0   | 0.007016  | 0.0054923 |
| IFA | TG 42:0   | 0.0106121 | 0.0095075 |
| IFA | TG 42:1   | 0.0060958 | 0.0056794 |
| IFA | TG 42:2   | 0.0046848 | 0.0032918 |
| IFA | TG 42:3   | 0.0038745 | 0.0035986 |
| IFA | TG 44:0   | 0.0256535 | 0.0191692 |
| IFA | TG 44:1   | 0.0240785 | 0.0266836 |
| IFA | TG 46:0   | 0.1032078 | 0.0600261 |
| IFA | TG 46:1   | 0.0809097 | 0.0676569 |
| IFA | TG 46:2   | 0.0360252 | 0.0316921 |
| IFA | TG 46:3   | 0.0025536 | 0.0016564 |
| IFA | TG 48:1   | 0.5659861 | 0.3226701 |
| IFA | TG 48:2   | 0.1440778 | 0.0914472 |
| IFA | TG 48:3   | 0.0408615 | 0.0288546 |
| IFA | TG 48:4   | 0.0066347 | 0.0055146 |
| IFA | TG 49:1   | 0.0041158 | 0.0020547 |
| IFA | TG 49:2   | 0.0158728 | 0.0073096 |
| IFA | TG 49:3   | 0.0033593 | 0.0016306 |
| IFA | TG 50:0   | 0.0590218 | 0.0302177 |
| IFA | TG 50:1   | 1.0021554 | 1.0765837 |
| IFA | TG 50:2   | 1.2092873 | 0.5671286 |
| IFA | TG 50:3   | 0.2525405 | 0.14027   |
| IFA | TG 50:4   | 0.0419162 | 0.0265651 |
| IFA | TG 50:5   | 0.0039582 | 0.0024576 |
| IFA | TG 51:1   | 0.019165  | 0.0089742 |
| IFA | TG 51:2   | 0.0363267 | 0.018948  |

|     |                 |           |           |
|-----|-----------------|-----------|-----------|
| IFA | TG 51:3         | 0.0186234 | 0.0094593 |
| IFA | TG 51:4         | 0.0035598 | 0.0020191 |
| IFA | TG 52:1         | 0.2406567 | 0.1373493 |
| IFA | TG 52:2         | 2.1983564 | 1.5269972 |
| IFA | TG 52:3         | 2.592215  | 1.1982277 |
| IFA | TG 52:4.1       | 0.6601893 | 0.3405633 |
| IFA | TG 52:5         | 0.0345012 | 0.0222165 |
| IFA | TG 52:6         | 0.0066296 | 0.0051064 |
| IFA | TG 53:1         | 0.0070831 | 0.0026819 |
| IFA | TG 53:2         | 0.0217316 | 0.0121459 |
| IFA | TG 53:3         | 0.0211441 | 0.0102973 |
| IFA | TG 53:4         | 0.0105091 | 0.0044903 |
| IFA | TG 54:1         | 0.0278167 | 0.0144222 |
| IFA | TG 54:2         | 0.1824766 | 0.1045102 |
| IFA | TG 54:3         | 0.7642644 | 0.4227972 |
| IFA | TG 54:4         | 0.525667  | 0.3337828 |
| IFA | TG 54:5         | 0.1624144 | 0.0669403 |
| IFA | TG 54:6         | 0.0637448 | 0.0338624 |
| IFA | TG 56:3         | 0.0116036 | 0.0062336 |
| IFA | TG 56:4         | 0.0168888 | 0.0131314 |
| IFA | TG 56:5         | 0.0390634 | 0.0200898 |
| IFA | TG 56:6         | 0.1072349 | 0.0411735 |
| IFA | TG 56:7         | 0.1827324 | 0.1075734 |
| IFA | TG 56:8         | 0.0016791 | 0.0014794 |
| IFA | TG 57:1         | 0.0083727 | 0.0071137 |
| IFA | TG 58:1         | 0.004774  | 0.003442  |
| IFA | TG 58:3         | 0.0030075 | 0.0020274 |
| IFA | TG 58:6         | 0.0055418 | 0.0025839 |
| IFA | TG 58:8         | 0.0047328 | 0.0036193 |
| IFA | TG 58:9         | 0.0309698 | 0.0200027 |
| IFA | Ceramide 32:1 d | 0.0002928 | 0.0001133 |
| IFA | Ceramide 34:0 d | 0.0006396 | 0.0002646 |
| IFA | Ceramide 34:1 d | 0.0027725 | 0.0008183 |
| IFA | Ceramide 34:2 d | 0.0002763 | 0.0000688 |
| IFA | Ceramide 36:1 d | 0.001005  | 0.0004663 |
| IFA | Ceramide 38:1 d | 0.000695  | 0.0002562 |
| IFA | Ceramide 39:1 d | 0.0002916 | 0.0001141 |
| IFA | Ceramide 40:0 d | 0.0012619 | 0.0005959 |
| IFA | Ceramide 40:1 d | 0.0033829 | 0.0009764 |
| IFA | Ceramide 40:2 d | 0.0004708 | 0.0001347 |
| IFA | Ceramide 41:1 d | 0.0024802 | 0.0007011 |
| IFA | Ceramide 42:0 d | 0.0019383 | 0.0009137 |
| IFA | Ceramide 42:1 d | 0.0159552 | 0.0060927 |

|     |                 |           |           |
|-----|-----------------|-----------|-----------|
| IFA | Ceramide 44:1 d | 0.0002671 | 0.0001076 |
| IFA | FA 12:0         | 0.0066281 | 0.0071516 |
| IFA | FA 13:0         | 0.0009401 | 0.0004714 |
| IFA | FA 14:0         | 0.0287537 | 0.0217693 |
| IFA | FA 14:1         | 0.0010194 | 0.0006833 |
| IFA | FA 15:0         | 0.0161904 | 0.0085919 |
| IFA | FA 15:1         | 0.0016708 | 0.0010802 |
| IFA | FA 16:0         | 1.9198203 | 1.4006561 |
| IFA | FA 16:1         | 0.0191451 | 0.0123539 |
| IFA | FA 17:0         | 0.0247965 | 0.014157  |
| IFA | FA 18:1         | 0.1646577 | 0.1001472 |
| IFA | FA 18:2         | 0.0313803 | 0.015915  |
| IFA | FA 18:3         | 0.0009323 | 0.0004946 |
| IFA | FA 20:0         | 0.0533295 | 0.0344251 |
| IFA | FA 20:1         | 0.0057359 | 0.0027089 |
| IFA | FA 20:2         | 0.0011786 | 0.0008093 |
| IFA | FA 20:3         | 0.0003761 | 0.0002074 |
| IFA | FA 20:3.1       | 0.0007403 | 0.000316  |
| IFA | FA 20:4         | 0.0023513 | 0.0008496 |
| IFA | FA 20:5         | 0.0007189 | 0.0004577 |
| IFA | FA 22:1         | 0.0111035 | 0.0065041 |
| IFA | FA 22:2         | 0.0005387 | 0.0002785 |
| IFA | FA 22:6         | 0.0015892 | 0.0007912 |
| IFA | FA 24:0         | 0.0295301 | 0.0118436 |
| IFA | FA 24:1         | 0.0028836 | 0.0017223 |
| IFA | FA 26:0         | 0.0102839 | 0.0050825 |
| IFA | FA 28:0         | 0.0034348 | 0.0017696 |
| IFA | GlcCer 40:1 d.1 | 0.0026785 | 0.0007077 |
| IFA | GlcCer 41:1 d   | 0.0014515 | 0.0003318 |
| IFA | GlcCer 42:1 d.1 | 0.0052196 | 0.0014145 |
| IFA | GlcCer 14:1 d   | 0.0002688 | 0.0000843 |
| IFA | LPC 18:1        | 0.0074064 | 0.0067438 |
| IFA | LPE 20:4        | 0.0017508 | 0.0007614 |
| IFA | PC 34:1 ox      | 0.1782963 | 0.120497  |
| IFA | PC 36:1 ox      | 0.0894071 | 0.0639421 |
| IFA | PC 36:3 ox      | 0.0760728 | 0.0494009 |
| IFA | PC 36:4 ox      | 0.0108022 | 0.0096028 |
| IFA | PC 38:3 ox      | 0.0342822 | 0.0228373 |
| IFA | PC 38:5 ox      | 0.0875128 | 0.0548806 |
| IFA | PC 32:2         | 0.041125  | 0.0218242 |
| IFA | PC 33:1.1       | 0.0120778 | 0.0041261 |
| IFA | PC 34:3.1       | 0.0423983 | 0.0143412 |
| IFA | PC 34:4         | 0.0123839 | 0.0064009 |

|     |             |           |           |
|-----|-------------|-----------|-----------|
| IFA | PC 35:1.1   | 0.0183162 | 0.0046394 |
| IFA | PC 35:2.1   | 0.0471128 | 0.0104684 |
| IFA | PC 35:4.1   | 0.0065557 | 0.0013707 |
| IFA | PC 36:3.3   | 0.7124727 | 0.1437203 |
| IFA | PC 36:5.2   | 0.0053601 | 0.002698  |
| IFA | PC 37:2     | 0.0109624 | 0.002906  |
| IFA | PC 38:3.1   | 0.3452416 | 0.0877722 |
| IFA | PC 40:4.1   | 0.0237669 | 0.0086024 |
| IFA | PC 40:5.2   | 0.0207383 | 0.00731   |
| IFA | PC 40:6.2   | 0.0052069 | 0.0020789 |
| IFA | PC 40:8.1   | 0.0144949 | 0.003709  |
| IFA | PC 32:0 p.1 | 0.0224867 | 0.0059452 |
| IFA | PC 34:0 p   | 0.049042  | 0.0107566 |
| IFA | PC 34:1 p.1 | 0.0301399 | 0.0081112 |
| IFA | PC 34:2 p.1 | 0.083143  | 0.0155139 |
| IFA | PC 36:1 p.1 | 0.013587  | 0.0035097 |
| IFA | PC 36:3 p.1 | 0.2078383 | 0.0669219 |
| IFA | PC 36:4 p.1 | 0.1552032 | 0.0535158 |
| IFA | PC 38:4 p.2 | 0.1615937 | 0.0640932 |
| IFA | PC 38:5 p.1 | 0.0370738 | 0.0165683 |
| IFA | PC 40:3 p.1 | 0.0112956 | 0.0026442 |
| IFA | PC 40:4 p.1 | 0.0171801 | 0.0050821 |
| IFA | PC 42:4 p   | 0.0142124 | 0.0041205 |
| IFA | PC 42:5 p.1 | 0.0053381 | 0.0018361 |
| IFA | PC 44:4 p   | 0.0196414 | 0.0054217 |
| IFA | PE 34:1     | 0.0195649 | 0.0193494 |
| IFA | PE 36:2     | 0.0857042 | 0.0536013 |
| IFA | PE 36:3     | 0.0296203 | 0.0215375 |
| IFA | PE 36:4.1   | 0.0588403 | 0.0583922 |
| IFA | PE 38:2     | 0.1145517 | 0.0500675 |
| IFA | PE 38:4     | 0.109448  | 0.0790307 |
| IFA | PE 38:6.1   | 0.1090591 | 0.0714314 |
| IFA | PE 40:6     | 0.0578348 | 0.0233688 |
| IFA | PE 34:1 p.1 | 0.0336497 | 0.015536  |
| IFA | PE 34:2 p   | 0.0649856 | 0.0326308 |
| IFA | PE 36:1 p   | 0.0245823 | 0.0138358 |
| IFA | PE 36:2 p.1 | 0.088318  | 0.0536387 |
| IFA | PE 36:4 p.1 | 0.320295  | 0.1646583 |
| IFA | PE 36:5 p   | 0.0511178 | 0.03858   |
| IFA | PE 38:3 p   | 0.0174866 | 0.0110981 |
| IFA | PE 38:4 p.1 | 0.3041991 | 0.1729397 |
| IFA | PE 38:5 p.1 | 0.1340207 | 0.0639391 |
| IFA | PE 38:6 p   | 0.201743  | 0.0900529 |



|        |                    |            |           |
|--------|--------------------|------------|-----------|
| IFA    | PE 40:4 p          | 0.0417752  | 0.0204789 |
| IFA    | PE 40:5 p.1        | 0.0236518  | 0.0112022 |
| IFA    | PE 40:6 p          | 0.1680759  | 0.06853   |
| IFA    | PE 40:7 p          | 0.0818823  | 0.0371542 |
| IFA    | PE 40:6.1          | 0.070704   | 0.0521237 |
| IFA    | SM 32:1 d          | 0.6040555  | 0.2432702 |
| IFA    | SM 33:1 d          | 0.1027727  | 0.0272922 |
| IFA    | SM 34:1 d          | 0.1409922  | 0.0206633 |
| IFA    | SM 39:1 d          | 0.1490923  | 0.0357333 |
| IFA    | SM 40:2 d.1        | 0.597116   | 0.1536945 |
| IFA    | SM 40:3 d          | 0.039853   | 0.0158486 |
| IFA    | SM 41:1 d          | 0.5657862  | 0.1712711 |
| IFA    | SM 41:2 d          | 0.2437669  | 0.0814548 |
| IFA    | SM 42:1 d.1        | 1.8715929  | 0.5188128 |
| IFA    | SM 43:2 d          | 0.0258866  | 0.0088591 |
| SQ-LNS | CE 16:1            | 0.1172686  | 0.0375424 |
| SQ-LNS | CE 18:1            | 2.5704347  | 0.8078552 |
| SQ-LNS | CE 18:2            | 16.5461683 | 3.7542437 |
| SQ-LNS | CE 18:3            | 0.1422087  | 0.0491212 |
| SQ-LNS | CE 20:3            | 0.2404385  | 0.0767924 |
| SQ-LNS | CE 20:4            | 1.9353538  | 0.8541507 |
| SQ-LNS | CE 20:5            | 0.4098558  | 0.2457458 |
| SQ-LNS | CE 22:6            | 0.6411996  | 0.2085378 |
| SQ-LNS | Ceramide 42:2 d    | 0.0084946  | 0.0293267 |
| SQ-LNS | Cholesterol        | 7.9439618  | 1.0939401 |
| SQ-LNS | DG 32:1            | 0.0306967  | 0.0196531 |
| SQ-LNS | DG 34:1            | 0.1886315  | 0.2178358 |
| SQ-LNS | DG 34:2            | 0.262915   | 0.8738713 |
| SQ-LNS | DG 34:3            | 0.0078732  | 0.0051651 |
| SQ-LNS | DG 36:1            | 0.0355209  | 0.0699222 |
| SQ-LNS | DG 36:2            | 0.240809   | 0.5201445 |
| SQ-LNS | DG 36:3            | 0.2203406  | 0.1780222 |
| SQ-LNS | DG 36:4 A          | 0.0445387  | 0.045145  |
| SQ-LNS | DG 38:5            | 0.0552547  | 0.1400318 |
| SQ-LNS | DG 38:6            | 0.0297175  | 0.0429936 |
| SQ-LNS | GlcCer 40:1 d      | 0.006362   | 0.0015482 |
| SQ-LNS | GlcCer 42:1 d      | 0.010395   | 0.002391  |
| SQ-LNS | GlcCer 42:2 d      | 0.0107109  | 0.0028466 |
| SQ-LNS | Gal-Gal-Cer 42:2 d | 0.0009497  | 0.0004893 |
| SQ-LNS | LPC 20:0           | 0.0013124  | 0.0006989 |
| SQ-LNS | LPC 20:1           | 0.0010376  | 0.0006871 |
| SQ-LNS | LPC 22:4           | 0.0013313  | 0.0013149 |
| SQ-LNS | LPC 22:6           | 0.0030319  | 0.0034239 |

|        |            |            |           |
|--------|------------|------------|-----------|
| SQ-LNS | LPC 16:0 o | 0.0037945  | 0.0034384 |
| SQ-LNS | LPC 16:0 p | 0.0027348  | 0.0018153 |
| SQ-LNS | LPC 16:0   | 0.0477863  | 0.0278614 |
| SQ-LNS | LPC 18:0   | 0.0866232  | 0.0450481 |
| SQ-LNS | LPC 18:2   | 0.0072848  | 0.0138528 |
| SQ-LNS | LPC 20:3   | 0.0009618  | 0.0013843 |
| SQ-LNS | LPC 20:4   | 0.0043289  | 0.0044051 |
| SQ-LNS | LPC 20:5   | 0.0005992  | 0.0005718 |
| SQ-LNS | PC 25:0    | 0.0048714  | 0.0038456 |
| SQ-LNS | PC 37:3    | 0.0068339  | 0.0022003 |
| SQ-LNS | PC 39:6    | 0.0192601  | 0.0095333 |
| SQ-LNS | PC 42:5    | 0.0038281  | 0.0017599 |
| SQ-LNS | PC 42:6    | 0.0018966  | 0.0011516 |
| SQ-LNS | PC 32:0 p  | 0.0336667  | 0.0101927 |
| SQ-LNS | PC 36:3 p  | 0.265237   | 0.0733309 |
| SQ-LNS | PC 38:2 p  | 0.0071739  | 0.0020064 |
| SQ-LNS | PC 42:3 p  | 0.0069965  | 0.0023865 |
| SQ-LNS | PC 34:1    | 0.0623357  | 0.0193641 |
| SQ-LNS | PC 36:3    | 0.0743385  | 0.0155648 |
| SQ-LNS | PC 36:5    | 0.6194141  | 0.143297  |
| SQ-LNS | PC 38:4    | 0.0351583  | 0.0103654 |
| SQ-LNS | PC 40:6    | 0.0265605  | 0.0096341 |
| SQ-LNS | PC 28:0    | 0.005046   | 0.0034233 |
| SQ-LNS | PC 30:0    | 0.1312689  | 0.0783405 |
| SQ-LNS | PC 31:0    | 0.0033269  | 0.001386  |
| SQ-LNS | PC 32:0    | 0.1653747  | 0.0671799 |
| SQ-LNS | PC 32:1    | 0.1588391  | 0.0835923 |
| SQ-LNS | PC 33:0    | 0.0044926  | 0.002161  |
| SQ-LNS | PC 33:1    | 0.0230748  | 0.0095425 |
| SQ-LNS | PC 33:2    | 0.023875   | 0.0082652 |
| SQ-LNS | PC 34:0    | 0.0308811  | 0.0055635 |
| SQ-LNS | PC 34:1.1  | 5.4348017  | 1.9297814 |
| SQ-LNS | PC 34:2    | 12.4044609 | 2.7498819 |
| SQ-LNS | PC 34:3    | 0.0237397  | 0.018558  |
| SQ-LNS | PC 35:1    | 0.0251091  | 0.0081639 |
| SQ-LNS | PC 35:2    | 0.0614211  | 0.0262102 |
| SQ-LNS | PC 35:3    | 0.0132715  | 0.0052922 |
| SQ-LNS | PC 35:4    | 0.0069946  | 0.0019665 |
| SQ-LNS | PC 36:1    | 0.5897235  | 0.2094777 |
| SQ-LNS | PC 36:2    | 6.0514834  | 1.5973228 |
| SQ-LNS | PC 36:3.1  | 0.9733252  | 0.3439876 |
| SQ-LNS | PC 36:3.2  | 1.0874944  | 0.3132306 |
| SQ-LNS | PC 36:4    | 0.2041814  | 0.0973363 |

|        |             |           |           |
|--------|-------------|-----------|-----------|
| SQ-LNS | PC 36:4.1   | 0.0721607 | 0.0339318 |
| SQ-LNS | PC 36:5.1   | 0.0393919 | 0.1296014 |
| SQ-LNS | PC 36:6     | 0.0121756 | 0.006808  |
| SQ-LNS | PC 37:4     | 0.0186188 | 0.0103226 |
| SQ-LNS | PC 37:6     | 0.0063777 | 0.0019863 |
| SQ-LNS | PC 38:2     | 0.0397587 | 0.0093036 |
| SQ-LNS | PC 38:3     | 0.4119036 | 0.1217888 |
| SQ-LNS | PC 38:4.1   | 0.0810662 | 0.0285069 |
| SQ-LNS | PC 38:5     | 0.6215453 | 0.189588  |
| SQ-LNS | PC 38:5.1   | 0.2952537 | 0.1508099 |
| SQ-LNS | PC 38:6     | 7.1127158 | 1.9166711 |
| SQ-LNS | PC 38:7     | 0.0066044 | 0.0034111 |
| SQ-LNS | PC 40:4     | 0.0248568 | 0.0077324 |
| SQ-LNS | PC 40:5     | 0.2616236 | 0.0900439 |
| SQ-LNS | PC 40:5.1   | 0.0323922 | 0.0134681 |
| SQ-LNS | PC 40:6.1   | 1.2156765 | 0.4251956 |
| SQ-LNS | PC 40:7     | 0.0126845 | 0.0275439 |
| SQ-LNS | PC 40:8     | 0.0134552 | 0.0050849 |
| SQ-LNS | PC 32:0 o   | 0.0281432 | 0.0101377 |
| SQ-LNS | PC 34:0 o   | 0.0028988 | 0.00106   |
| SQ-LNS | PC 32:1 p   | 0.006231  | 0.0019771 |
| SQ-LNS | PC 34:1 p   | 0.0757199 | 0.0247489 |
| SQ-LNS | PC 34:2 p   | 0.1119818 | 0.0288562 |
| SQ-LNS | PC 36:1 p   | 0.0040475 | 0.0011834 |
| SQ-LNS | PC 36:2 p   | 0.0140285 | 0.0032869 |
| SQ-LNS | PC 36:4 p   | 0.3457668 | 0.1184345 |
| SQ-LNS | PC 38:3 p   | 0.079174  | 0.0206566 |
| SQ-LNS | PC 38:4 p   | 0.2729425 | 0.0811178 |
| SQ-LNS | PC 38:4 p.1 | 0.0490453 | 0.0146622 |
| SQ-LNS | PC 38:5 p   | 0.1369679 | 0.0435463 |
| SQ-LNS | PC 40:3 p   | 0.0113999 | 0.0034688 |
| SQ-LNS | PC 40:4 p   | 0.0208587 | 0.0056971 |
| SQ-LNS | PC 40:5 p   | 0.0376691 | 0.0103214 |
| SQ-LNS | PC 40:6 p   | 0.0960779 | 0.0340754 |
| SQ-LNS | PC 40:6 p.1 | 0.0360321 | 0.0130526 |
| SQ-LNS | PC 42:5 p   | 0.0056704 | 0.0025689 |
| SQ-LNS | PE 34:3     | 0.1148354 | 0.0742051 |
| SQ-LNS | PE 38:7     | 0.4085992 | 0.2686413 |
| SQ-LNS | PE 34:2     | 0.0834202 | 0.0403411 |
| SQ-LNS | PE 36:1     | 0.0279161 | 0.0130278 |
| SQ-LNS | PE 36:4     | 0.070651  | 0.0298363 |
| SQ-LNS | PE 38:6     | 0.1940924 | 0.0876449 |
| SQ-LNS | PE 34:1 p   | 0.0446616 | 0.0327414 |

|        |           |           |           |
|--------|-----------|-----------|-----------|
| SQ-LNS | PE 36:2 p | 0.1029268 | 0.0592955 |
| SQ-LNS | PE 36:4 p | 0.4953766 | 0.3926091 |
| SQ-LNS | PE 38:4 p | 0.4232692 | 0.2942923 |
| SQ-LNS | PE 38:5 p | 0.2318585 | 0.1721598 |
| SQ-LNS | PE 40:5 p | 0.0535427 | 0.030376  |
| SQ-LNS | SM 37:1 d | 0.0082721 | 0.0021362 |
| SQ-LNS | SM 38:0 d | 0.0084384 | 0.0034748 |
| SQ-LNS | SM 39:2 d | 0.0058114 | 0.0014984 |
| SQ-LNS | SM 42:0 d | 0.0040643 | 0.0016704 |
| SQ-LNS | SM 44:2 d | 0.0040925 | 0.001768  |
| SQ-LNS | SM 42:1 d | 0.0274527 | 0.0114634 |
| SQ-LNS | SM 30:1 d | 0.0067356 | 0.0034033 |
| SQ-LNS | SM 32:0 d | 0.0035501 | 0.0018594 |
| SQ-LNS | SM 32:2 d | 0.0096374 | 0.0038489 |
| SQ-LNS | SM 34:0 d | 0.0583558 | 0.0178946 |
| SQ-LNS | SM 34:2 d | 0.1582544 | 0.0336282 |
| SQ-LNS | SM 36:0 d | 0.0272507 | 0.012595  |
| SQ-LNS | SM 36:1 d | 0.2285555 | 0.0625031 |
| SQ-LNS | SM 36:2 d | 0.2886074 | 0.075667  |
| SQ-LNS | SM 36:3 d | 0.0036113 | 0.0013661 |
| SQ-LNS | SM 38:1 d | 0.1346627 | 0.0294519 |
| SQ-LNS | SM 38:2 d | 0.0719533 | 0.0161779 |
| SQ-LNS | SM 40:0 d | 0.0120294 | 0.0052342 |
| SQ-LNS | SM 40:1 d | 0.2754813 | 0.0549353 |
| SQ-LNS | SM 40:2 d | 0.1443573 | 0.0278784 |
| SQ-LNS | SM 42:2 d | 0.6287308 | 0.1752583 |
| SQ-LNS | SM 42:3 d | 0.3302789 | 0.071043  |
| SQ-LNS | SM 43:1 d | 0.001799  | 0.0011482 |
| SQ-LNS | TG 52:4   | 0.0332221 | 0.0129615 |
| SQ-LNS | TG 40:0   | 0.0078556 | 0.0046118 |
| SQ-LNS | TG 42:0   | 0.0107287 | 0.0070818 |
| SQ-LNS | TG 42:1   | 0.0068933 | 0.0054528 |
| SQ-LNS | TG 42:2   | 0.0050585 | 0.0035522 |
| SQ-LNS | TG 42:3   | 0.0047871 | 0.0050918 |
| SQ-LNS | TG 44:0   | 0.0261402 | 0.0150106 |
| SQ-LNS | TG 44:1   | 0.0264604 | 0.0221281 |
| SQ-LNS | TG 46:0   | 0.105516  | 0.0543367 |
| SQ-LNS | TG 46:1   | 0.0867889 | 0.0616148 |
| SQ-LNS | TG 46:2   | 0.0379196 | 0.0273824 |
| SQ-LNS | TG 46:3   | 0.003257  | 0.0021997 |
| SQ-LNS | TG 48:1   | 0.5626962 | 0.2925713 |
| SQ-LNS | TG 48:2   | 0.1438373 | 0.0804847 |
| SQ-LNS | TG 48:3   | 0.0460452 | 0.0327937 |

|        |                 |           |           |
|--------|-----------------|-----------|-----------|
| SQ-LNS | TG 48:4         | 0.0083208 | 0.0071226 |
| SQ-LNS | TG 49:1         | 0.0041954 | 0.0018325 |
| SQ-LNS | TG 49:2         | 0.0169838 | 0.0075757 |
| SQ-LNS | TG 49:3         | 0.0033585 | 0.0023448 |
| SQ-LNS | TG 50:0         | 0.058592  | 0.0267954 |
| SQ-LNS | TG 50:1         | 0.9162823 | 0.8320556 |
| SQ-LNS | TG 50:2         | 1.1478158 | 0.4073598 |
| SQ-LNS | TG 50:3         | 0.2417879 | 0.1049906 |
| SQ-LNS | TG 50:4         | 0.042297  | 0.0238009 |
| SQ-LNS | TG 50:5         | 0.0044362 | 0.0023304 |
| SQ-LNS | TG 51:1         | 0.019202  | 0.0079921 |
| SQ-LNS | TG 51:2         | 0.0341554 | 0.0138308 |
| SQ-LNS | TG 51:3         | 0.0174202 | 0.0062931 |
| SQ-LNS | TG 51:4         | 0.0037143 | 0.0015339 |
| SQ-LNS | TG 52:1         | 0.2348302 | 0.1103584 |
| SQ-LNS | TG 52:2         | 2.248459  | 1.4384472 |
| SQ-LNS | TG 52:3         | 2.5911007 | 0.9890893 |
| SQ-LNS | TG 52:4.1       | 0.6914702 | 0.3350214 |
| SQ-LNS | TG 52:5         | 0.0359948 | 0.0194739 |
| SQ-LNS | TG 52:6         | 0.006045  | 0.0033895 |
| SQ-LNS | TG 53:1         | 0.007795  | 0.0034793 |
| SQ-LNS | TG 53:2         | 0.0218266 | 0.0112691 |
| SQ-LNS | TG 53:3         | 0.0212971 | 0.0085751 |
| SQ-LNS | TG 53:4         | 0.010304  | 0.0034295 |
| SQ-LNS | TG 54:1         | 0.0315867 | 0.0173837 |
| SQ-LNS | TG 54:2         | 0.1784553 | 0.0890126 |
| SQ-LNS | TG 54:3         | 0.7259255 | 0.3178531 |
| SQ-LNS | TG 54:4         | 0.5246409 | 0.26219   |
| SQ-LNS | TG 54:5         | 0.161007  | 0.0588594 |
| SQ-LNS | TG 54:6         | 0.0611312 | 0.0240471 |
| SQ-LNS | TG 56:3         | 0.0110907 | 0.0048798 |
| SQ-LNS | TG 56:4         | 0.0138708 | 0.0091145 |
| SQ-LNS | TG 56:5         | 0.0413495 | 0.0199761 |
| SQ-LNS | TG 56:6         | 0.1104069 | 0.0390809 |
| SQ-LNS | TG 56:7         | 0.193695  | 0.1161735 |
| SQ-LNS | TG 56:8         | 0.0017132 | 0.0010113 |
| SQ-LNS | TG 57:1         | 0.0065229 | 0.0060171 |
| SQ-LNS | TG 58:1         | 0.0045234 | 0.003258  |
| SQ-LNS | TG 58:3         | 0.0031279 | 0.0017908 |
| SQ-LNS | TG 58:6         | 0.0055387 | 0.0023034 |
| SQ-LNS | TG 58:8         | 0.0045036 | 0.0024864 |
| SQ-LNS | TG 58:9         | 0.0317853 | 0.0172436 |
| SQ-LNS | Ceramide 32:1 d | 0.0013969 | 0.0068059 |

|        |                 |           |           |
|--------|-----------------|-----------|-----------|
| SQ-LNS | Ceramide 34:0 d | 0.0008794 | 0.0019474 |
| SQ-LNS | Ceramide 34:1 d | 0.0121097 | 0.0578162 |
| SQ-LNS | Ceramide 34:2 d | 0.0047711 | 0.0283305 |
| SQ-LNS | Ceramide 36:1 d | 0.0028992 | 0.0124878 |
| SQ-LNS | Ceramide 38:1 d | 0.0025634 | 0.0117642 |
| SQ-LNS | Ceramide 39:1 d | 0.0007598 | 0.0028978 |
| SQ-LNS | Ceramide 40:0 d | 0.0012374 | 0.0009647 |
| SQ-LNS | Ceramide 40:1 d | 0.0068511 | 0.0217862 |
| SQ-LNS | Ceramide 40:2 d | 0.0034911 | 0.0189749 |
| SQ-LNS | Ceramide 41:1 d | 0.0034823 | 0.0065247 |
| SQ-LNS | Ceramide 42:0 d | 0.0017815 | 0.0009398 |
| SQ-LNS | Ceramide 42:1 d | 0.0187138 | 0.0217754 |
| SQ-LNS | Ceramide 44:1 d | 0.000287  | 0.0001911 |
| SQ-LNS | FA 12:0         | 0.0052904 | 0.0049265 |
| SQ-LNS | FA 13:0         | 0.0012885 | 0.0021053 |
| SQ-LNS | FA 14:0         | 0.0341244 | 0.0584196 |
| SQ-LNS | FA 14:1         | 0.004127  | 0.0175151 |
| SQ-LNS | FA 15:0         | 0.0337536 | 0.0961399 |
| SQ-LNS | FA 15:1         | 0.0064931 | 0.0262332 |
| SQ-LNS | FA 16:0         | 1.6806879 | 1.4411496 |
| SQ-LNS | FA 16:1         | 0.0668977 | 0.2472031 |
| SQ-LNS | FA 17:0         | 0.0328986 | 0.054919  |
| SQ-LNS | FA 18:1         | 0.1799265 | 0.1857238 |
| SQ-LNS | FA 18:2         | 0.0358925 | 0.0417978 |
| SQ-LNS | FA 18:3         | 0.0015126 | 0.0023479 |
| SQ-LNS | FA 20:0         | 0.0519653 | 0.0491859 |
| SQ-LNS | FA 20:1         | 0.0076104 | 0.0108292 |
| SQ-LNS | FA 20:2         | 0.0033988 | 0.0105294 |
| SQ-LNS | FA 20:3         | 0.0008934 | 0.002721  |
| SQ-LNS | FA 20:3.1       | 0.0008502 | 0.0007836 |
| SQ-LNS | FA 20:4         | 0.0026703 | 0.0021525 |
| SQ-LNS | FA 20:5         | 0.0007859 | 0.0006339 |
| SQ-LNS | FA 22:1         | 0.0102528 | 0.006256  |
| SQ-LNS | FA 22:2         | 0.0010511 | 0.0025574 |
| SQ-LNS | FA 22:6         | 0.0018178 | 0.00168   |
| SQ-LNS | FA 24:0         | 0.0445648 | 0.0795674 |
| SQ-LNS | FA 24:1         | 0.0031482 | 0.0030622 |
| SQ-LNS | FA 26:0         | 0.0132946 | 0.0170698 |
| SQ-LNS | FA 28:0         | 0.0038908 | 0.0036526 |
| SQ-LNS | GlcCer 40:1 d.1 | 0.0029535 | 0.000727  |
| SQ-LNS | GlcCer 41:1 d   | 0.0015315 | 0.0003807 |
| SQ-LNS | GlcCer 42:1 d.1 | 0.0056147 | 0.001429  |
| SQ-LNS | GlcCer 14:1 d   | 0.0002745 | 0.0000974 |

|        |             |           |           |
|--------|-------------|-----------|-----------|
| SQ-LNS | LPC 18:1    | 0.0064346 | 0.0047371 |
| SQ-LNS | LPE 20:4    | 0.0015897 | 0.0007904 |
| SQ-LNS | PC 34:1 ox  | 0.1633026 | 0.1117518 |
| SQ-LNS | PC 36:1 ox  | 0.0869455 | 0.0667646 |
| SQ-LNS | PC 36:3 ox  | 0.0680817 | 0.0460763 |
| SQ-LNS | PC 36:4 ox  | 0.0089308 | 0.0058718 |
| SQ-LNS | PC 38:3 ox  | 0.0333052 | 0.0245745 |
| SQ-LNS | PC 38:5 ox  | 0.0788452 | 0.0466738 |
| SQ-LNS | PC 32:2     | 0.035841  | 0.0166356 |
| SQ-LNS | PC 33:1.1   | 0.0103018 | 0.0042478 |
| SQ-LNS | PC 34:3.1   | 0.0384133 | 0.014787  |
| SQ-LNS | PC 34:4     | 0.010816  | 0.0055391 |
| SQ-LNS | PC 35:1.1   | 0.0166963 | 0.0053629 |
| SQ-LNS | PC 35:2.1   | 0.0438978 | 0.0108403 |
| SQ-LNS | PC 35:4.1   | 0.0057735 | 0.0015945 |
| SQ-LNS | PC 36:3.3   | 0.6666642 | 0.1950993 |
| SQ-LNS | PC 36:5.2   | 0.0047325 | 0.0022712 |
| SQ-LNS | PC 37:2     | 0.0107976 | 0.0030357 |
| SQ-LNS | PC 38:3.1   | 0.3513382 | 0.1000436 |
| SQ-LNS | PC 40:4.1   | 0.0227492 | 0.0074492 |
| SQ-LNS | PC 40:5.2   | 0.0191121 | 0.0081442 |
| SQ-LNS | PC 40:6.2   | 0.0046972 | 0.0017273 |
| SQ-LNS | PC 40:8.1   | 0.0132413 | 0.004149  |
| SQ-LNS | PC 32:0 p.1 | 0.0224336 | 0.0059068 |
| SQ-LNS | PC 34:0 p   | 0.0486178 | 0.0154074 |
| SQ-LNS | PC 34:1 p.1 | 0.0268755 | 0.0089101 |
| SQ-LNS | PC 34:2 p.1 | 0.0758884 | 0.0183447 |
| SQ-LNS | PC 36:1 p.1 | 0.012438  | 0.0038519 |
| SQ-LNS | PC 36:3 p.1 | 0.1951722 | 0.0527709 |
| SQ-LNS | PC 36:4 p.1 | 0.1466776 | 0.0458757 |
| SQ-LNS | PC 38:4 p.2 | 0.1466107 | 0.0413566 |
| SQ-LNS | PC 38:5 p.1 | 0.0350587 | 0.0101234 |
| SQ-LNS | PC 40:3 p.1 | 0.0106764 | 0.0032772 |
| SQ-LNS | PC 40:4 p.1 | 0.0161831 | 0.0043761 |
| SQ-LNS | PC 42:4 p   | 0.012957  | 0.0043903 |
| SQ-LNS | PC 42:5 p.1 | 0.004857  | 0.0017338 |
| SQ-LNS | PC 44:4 p   | 0.0184854 | 0.0062327 |
| SQ-LNS | PE 34:1     | 0.0147663 | 0.0076946 |
| SQ-LNS | PE 36:2     | 0.082601  | 0.041408  |
| SQ-LNS | PE 36:3     | 0.0280081 | 0.0161827 |
| SQ-LNS | PE 36:4.1   | 0.046685  | 0.0303738 |
| SQ-LNS | PE 38:2     | 0.1239872 | 0.0771388 |
| SQ-LNS | PE 38:4     | 0.1037742 | 0.0610657 |

|        |             |           |           |
|--------|-------------|-----------|-----------|
| SQ-LNS | PE 38:6.1   | 0.0942571 | 0.044743  |
| SQ-LNS | PE 40:6     | 0.0628568 | 0.0409313 |
| SQ-LNS | PE 34:1 p.1 | 0.0455344 | 0.06819   |
| SQ-LNS | PE 34:2 p   | 0.0655866 | 0.0452342 |
| SQ-LNS | PE 36:1 p   | 0.0285322 | 0.0307308 |
| SQ-LNS | PE 36:2 p.1 | 0.0837786 | 0.0496689 |
| SQ-LNS | PE 36:4 p.1 | 0.4020645 | 0.3676741 |
| SQ-LNS | PE 36:5 p   | 0.0649994 | 0.0530424 |
| SQ-LNS | PE 38:3 p   | 0.0182673 | 0.0145774 |
| SQ-LNS | PE 38:4 p.1 | 0.35287   | 0.2757311 |
| SQ-LNS | PE 38:5 p.1 | 0.1680656 | 0.136812  |
| SQ-LNS | PE 38:6 p   | 0.2507388 | 0.1802873 |
| SQ-LNS | PE 40:4 p   | 0.0432454 | 0.0275944 |
| SQ-LNS | PE 40:5 p.1 | 0.0256717 | 0.0165422 |
| SQ-LNS | PE 40:6 p   | 0.2018203 | 0.1421401 |
| SQ-LNS | PE 40:7 p   | 0.103705  | 0.0775974 |
| SQ-LNS | PE 40:6.1   | 0.0614635 | 0.0369444 |
| SQ-LNS | SM 32:1 d   | 0.6388281 | 0.3067823 |
| SQ-LNS | SM 33:1 d   | 0.1008706 | 0.0242546 |
| SQ-LNS | SM 34:1 d   | 0.139326  | 0.0294711 |
| SQ-LNS | SM 39:1 d   | 0.1617093 | 0.0452437 |
| SQ-LNS | SM 40:2 d.1 | 0.6006079 | 0.2135754 |
| SQ-LNS | SM 40:3 d   | 0.0402978 | 0.012407  |
| SQ-LNS | SM 41:1 d   | 0.5686648 | 0.15228   |
| SQ-LNS | SM 41:2 d   | 0.2463125 | 0.0669829 |
| SQ-LNS | SM 42:1 d.1 | 1.8647426 | 0.4814959 |
| SQ-LNS | SM 43:2 d   | 0.0267404 | 0.011101  |



| <b>Table S2. 33 HDL Associated Proteins.</b> |         |                |             |
|----------------------------------------------|---------|----------------|-------------|
| Treatment                                    | Protein | Mean Abundance | SD          |
| IFA                                          | APOC1   | 10811.85928    | 4721.299434 |
| IFA                                          | APOA1   | 1434574.094    | 537468.0296 |
| IFA                                          | FETUA   | 33573.28762    | 17359.22421 |
| IFA                                          | PLTP    | 5623.374983    | 4457.277207 |
| IFA                                          | APOD    | 329722.0244    | 124745.4338 |
| IFA                                          | SAA4    | 32818.62972    | 11662.22981 |
| IFA                                          | APOL1   | 8561.503842    | 8570.663364 |
| IFA                                          | AACT    | 5297.747485    | 3508.021458 |
| IFA                                          | APOE    | 61137.52336    | 42382.86114 |
| IFA                                          | A1AT    | 61361.18929    | 22378.9738  |
| IFA                                          | APOA2   | 194283.795     | 89854.10462 |
| IFA                                          | C1S     | 2074.737315    | 1108.66985  |
| IFA                                          | APOC2   | 242650.1624    | 190106.9337 |
| IFA                                          | APOA4   | 11295.49729    | 9835.211986 |
| IFA                                          | LCAT    | 2754.608693    | 1701.719108 |
| IFA                                          | A1BG    | 76818.44814    | 51910.24348 |
| IFA                                          | APOC4   | 975.8648138    | 949.1820964 |
| IFA                                          | APOM    | 853981.3669    | 288462.2957 |
| IFA                                          | C3      | 398.4395162    | 219.1307649 |
| IFA                                          | SAA2    | 14229.66271    | 9066.199282 |
| IFA                                          | SAA1    | 16262.24619    | 30428.87241 |
| IFA                                          | APOA    | 7.557435965    | 6.499382815 |
| IFA                                          | HPX     | 7562.57927     | 5447.714586 |
| IFA                                          | APOC3   | 46241.45447    | 57844.54375 |
| IFA                                          | APOF    | 1561.646202    | 1008.007114 |
| IFA                                          | HCF2    | 2914.654609    | 1608.458057 |
| IFA                                          | KNG1    | 7765.542371    | 6369.46123  |
| IFA                                          | APOH    | 1854.631842    | 1464.540365 |
| IFA                                          | PON1    | 16.96993885    | 21.56828186 |
| IFA                                          | CLUS    | 2545.537839    | 1228.904949 |
| IFA                                          | APOB    | 4325.351691    | 2240.120226 |
| IFA                                          | PON3    | 643.8255329    | 644.2029852 |
| IFA                                          | APOA5   | 9.084599445    | 6.937561639 |
| SQ-LNS                                       | APOC1   | 24343.81273    | 74660.13338 |
| SQ-LNS                                       | APOA1   | 1527916.768    | 468350.9347 |
| SQ-LNS                                       | FETUA   | 30807.90691    | 30708.42266 |
| SQ-LNS                                       | PLTP    | 5928.588681    | 3818.181819 |
| SQ-LNS                                       | APOD    | 347311.1365    | 137578.4109 |
| SQ-LNS                                       | SAA4    | 36651.03133    | 20392.23984 |
| SQ-LNS                                       | APOL1   | 7836.096267    | 6491.720431 |

|        |       |             |             |
|--------|-------|-------------|-------------|
| SQ-LNS | AACT  | 4511.620293 | 4065.214564 |
| SQ-LNS | APOE  | 73933.4948  | 62933.875   |
| SQ-LNS | A1AT  | 63538.09406 | 38373.98613 |
| SQ-LNS | APOA2 | 210157.6142 | 105517.1161 |
| SQ-LNS | C1S   | 1755.865029 | 1243.31605  |
| SQ-LNS | APOC2 | 252766.0797 | 165642.9704 |
| SQ-LNS | APOA4 | 8757.442428 | 6441.141791 |
| SQ-LNS | LCAT  | 3013.289631 | 1983.950556 |
| SQ-LNS | A1BG  | 66299.90019 | 75130.04769 |
| SQ-LNS | APOC4 | 1290.926044 | 1192.282178 |
| SQ-LNS | APOM  | 804693.8012 | 281472.0627 |
| SQ-LNS | C3    | 471.9884806 | 410.1395085 |
| SQ-LNS | SAA2  | 16249.56888 | 9897.608383 |
| SQ-LNS | SAA1  | 36468.54807 | 159310.3319 |
| SQ-LNS | APOA  | 7.498998449 | 9.154410747 |
| SQ-LNS | HEMO  | 7573.108655 | 10014.01744 |
| SQ-LNS | APOC3 | 46608.03706 | 37034.22342 |
| SQ-LNS | APOF  | 1848.63341  | 1251.221326 |
| SQ-LNS | HECF  | 2476.216139 | 1802.009654 |
| SQ-LNS | KNG1  | 7245.733778 | 9483.517209 |
| SQ-LNS | APOH  | 2032.34937  | 2009.99746  |
| SQ-LNS | PON1  | 38.54713922 | 131.8124813 |
| SQ-LNS | CLUS  | 2777.09503  | 1152.797746 |
| SQ-LNS | APOB  | 4911.270736 | 2882.565501 |
| SQ-LNS | PON3  | 751.040393  | 652.1189335 |
| SQ-LNS | APOA5 | 11.42376376 | 11.22191583 |

**Table S3.** Glycopeptides analysis from 21 HDL associated proteins.

| Treatment | Glycopeptides (n = 163) | Mean Abundance | SD        |
|-----------|-------------------------|----------------|-----------|
| IFA       | APOB_3224_54020_z3      | 0.0394947      | 0.0172598 |
| IFA       | APOB_3411_5401          | 0.0128901      | 0.0227725 |
| IFA       | AACT_271_6512           | 0.0078521      | 0.0076865 |
| IFA       | AACT_271_7603           | 0.031695       | 0.0255303 |
| IFA       | AACT_271_7602           | 0.0482093      | 0.0290721 |
| IFA       | AACT_271_6502           | 0.0020941      | 0.0022993 |
| IFA       | AACT_106_7603           | 0.0021432      | 0.0015894 |
| IFA       | APOB_185_52000_z3       | 0.8218095      | 1.5675627 |
| IFA       | APOB_983_5401           | 0.0252867      | 0.0106358 |
| IFA       | AACT_106_7604           | 0.0005456      | 0.0006506 |
| IFA       | A1BG_179_5421/5402      | 0.0178749      | 0.0039714 |
| IFA       | APOB_983_54020_z4       | 0.0412918      | 0.0144838 |
| IFA       | AACT_127_5401           | 0.0018222      | 0.0013482 |
| IFA       | AACT_127_8500           | 0.0454916      | 0.052064  |
| IFA       | A1AT_271_5412           | 0.0005245      | 0.0004244 |
| IFA       | A1AT_271_5402           | 0.0527909      | 0.0206704 |
| IFA       | A1AT_271_55110_z3       | 0.0002886      | 0.0002232 |
| IFA       | A1AT_271_5401           | 0.0005451      | 0.0003676 |
| IFA       | A1AT_271_6503           | 0.0002403      | 0.0002031 |
| IFA       | APOA2_35_11020_z3       | 0.0010285      | 0.0008335 |
| IFA       | APOA2_35_11010_z2       | 0.0000227      | 0.0000456 |
| IFA       | A1AT_271MC_5412         | 0.005606       | 0.00441   |
| IFA       | A1AT_107_5401           | 0.0174233      | 0.0101624 |
| IFA       | A1AT_107_5411           | 0.0356425      | 0.009788  |
| IFA       | A1AT_271MC_5402         | 0.1437275      | 0.0444519 |
| IFA       | A1AT_107_6512           | 0.0103113      | 0.0077278 |
| IFA       | A1AT_107_6502/6521      | 0.0265805      | 0.0107613 |
| IFA       | A1AT_107_5402           | 0.0606979      | 0.0154517 |
| IFA       | A1AT_107_5412           | 0.0051522      | 0.0021896 |
| IFA       | A1AT_107_6513           | 0.0084881      | 0.0058065 |
| IFA       | A1AT_107_6503           | 0.0256588      | 0.0102744 |
| IFA       | A1AT_107_6501/6520      | 0.0020917      | 0.0050324 |
| IFA       | APOA2_95_11010_z2       | 0.0003368      | 0.0001962 |
| IFA       | APOA2_88_11010_z2       | 0.0002829      | 0.0001727 |
| IFA       | A1AT_70_5412            | 0.0008311      | 0.0003813 |
| IFA       | A1AT_70_5402            | 0.0503268      | 0.0193743 |
| IFA       | APOD_65_65210_z3        | 0.0000209      | 0.0000178 |
| IFA       | APOD_65_65030_z3        | 0.000045       | 0.000044  |
| IFA       | APOD_98_54100_z3        | 0.0013688      | 0.0015123 |
| IFA       | APOD_98_54000_z3        | 0.0001259      | 0.0000645 |

|     |                             |           |           |
|-----|-----------------------------|-----------|-----------|
| IFA | APOD_65_65020_z3            | 0.0000239 | 0.0000288 |
| IFA | APOD_65_65010_z3            | 0.0000257 | 0.000018  |
| IFA | APOD_65_65020_z3_deamidated | 0.0001719 | 0.0001575 |
| IFA | APOD_98_65010_z3            | 0.0000192 | 0.0000233 |
| IFA | APOD_98_65110_z3            | 0.000041  | 0.0000257 |
| IFA | APOD_65_54010_z3            | 0.0000572 | 0.0000369 |
| IFA | APOD_98_54110_z3            | 0.000161  | 0.0000881 |
| IFA | APOD_98_54020_z3            | 0.0000193 | 0.0000221 |
| IFA | APOD_98_54010_z3            | 0.0000907 | 0.0000686 |
| IFA | APOD_65_54020_z3            | 0.000032  | 0.0000238 |
| IFA | APOD_98_65130_z3            | 0.0000244 | 0.0000252 |
| IFA | APOD_98_54120_z3            | 0.0000332 | 0.00003   |
| IFA | APOD_65_76020_z3            | 0.0000297 | 0.000028  |
| IFA | APOD_98_5402                | 0.0004665 | 0.0002325 |
| IFA | APOD_98_65320_z3            | 0.0000072 | 0.0000077 |
| IFA | APOD_65_54200_z3            | 0.0000498 | 0.0000387 |
| IFA | APOD_65_76210_z3            | 0.0000263 | 0.0000226 |
| IFA | APOD_65_65030_z3_deamidated | 0.0000185 | 0.0000137 |
| IFA | APOD_98_6520                | 0.0002007 | 0.0001675 |
| IFA | APOD_98_6510                | 0.0005036 | 0.0004456 |
| IFA | APOD_98_9800                | 0.0003908 | 0.0006734 |
| IFA | APOD_98_6530                | 0.0006519 | 0.0005456 |
| IFA | APOD_98_7600                | 0.0002658 | 0.0002406 |
| IFA | APOC3_94AMC_12020_z3        | 0.0256366 | 0.0418916 |
| IFA | APOC3_94AMC_22100_z3        | 0.0008421 | 0.0013659 |
| IFA | APOC3_94_1210               | 0.0011263 | 0.0014675 |
| IFA | APOC3_94_0310               | 0.0007523 | 0.0008252 |
| IFA | APOC3_94_0300               | 0.1284821 | 0.1720296 |
| IFA | APOC3_94AMC_11000_z3        | 0.0048801 | 0.0022002 |
| IFA | APOC3_94MC_11010_z3         | 0.0273929 | 0.0125607 |
| IFA | APOC3_94A_11010_z2          | 0.0010305 | 0.0008245 |
| IFA | APOC3_94MC_1102             | 0.1616978 | 0.031748  |
| IFA | APOC3_94MC_11020_z3         | 0.0112174 | 0.0057145 |
| IFA | APOC3_94_1101               | 0.1479717 | 0.0421585 |
| IFA | APOC3_94A_11000_z2          | 0.0006624 | 0.0005272 |
| IFA | APOC3_94Aoff_1101           | 0.0080437 | 0.0048694 |
| IFA | APOC3_94_2110               | 0.0009794 | 0.0012795 |
| IFA | APOC3_94Aoff_1102           | 0.0056151 | 0.0045721 |
| IFA | APOC3_94_1102               | 0.1055842 | 0.023329  |
| IFA | APOC3_94A_11020_z2          | 0.0002285 | 0.000188  |
| IFA | APOC3_94_1111               | 0.0056157 | 0.0138182 |
| IFA | APOC3_94_1300               | 0.0030746 | 0.0043121 |
| IFA | APOC3_94_1202               | 0.0057645 | 0.0081593 |

|     |                       |           |           |
|-----|-----------------------|-----------|-----------|
| IFA | CLUS_291_5400         | 0.0573338 | 0.0744249 |
| IFA | CLUS_291_6503         | 0.018689  | 0.0390782 |
| IFA | CLUS_291_54020_z3     | 0.1482094 | 0.0418989 |
| IFA | CLUS_291_5421/5402    | 0.1232955 | 0.0391082 |
| IFA | CLUS_291_5420/5401    | 0.0408822 | 0.0241741 |
| IFA | CLUS_86_6503          | 0.0013877 | 0.0007987 |
| IFA | APOF_269_11010_z2     | 0.0808883 | 0.0227037 |
| IFA | APOF_273/274_11010_z3 | 2.251669  | 0.4186461 |
| IFA | APOF_273/274_11020_z3 | 0.9569323 | 0.1903533 |
| IFA | APOE_307/308_11010_z3 | 0.038893  | 0.0090965 |
| IFA | APOE_307/308_11010_z2 | 0.0010153 | 0.0003066 |
| IFA | CLUS_374_6520/6501    | 0.1244688 | 0.0534979 |
| IFA | CLUS_374_5402/5421    | 0.106659  | 0.0333114 |
| IFA | APOE_215_11010_z2     | 0.0062528 | 0.0067569 |
| IFA | CLUS_374_5420/5401    | 1.7521068 | 1.1364774 |
| IFA | APOE_215_11020_z2     | 0.001846  | 0.0016198 |
| IFA | CLUS_374_6512         | 0.1395672 | 0.0940911 |
| IFA | CO3_85_6200           | 0.5173679 | 0.2220976 |
| IFA | CO3_85_5200           | 0.4647495 | 0.218606  |
| IFA | CO3_85_7200           | 0.2139657 | 0.1496251 |
| IFA | APOM_135_43010_z3     | 0.0006191 | 0.0002381 |
| IFA | APOM_135_54010_z3     | 0.00039   | 0.0000915 |
| IFA | APOM_135_53010_z3     | 0.0001145 | 0.0000548 |
| IFA | CO3_85_6301           | 1.0192401 | 0.7802088 |
| IFA | APOM_135_54020_z3     | 0.000154  | 0.0000673 |
| IFA | APOM_135_44010_z3     | 0.0000445 | 0.0000384 |
| IFA | APOM_135_55110_z3     | 0.0000304 | 0.0000166 |
| IFA | C1S_174_5402          | 0.0083218 | 0.0048297 |
| IFA | C1S_174_5401          | 0.0092951 | 0.0068835 |
| IFA | APOM_135_5421         | 0.0001529 | 0.0001102 |
| IFA | APOM_135_8500         | 0.0000314 | 0.0000162 |
| IFA | HEMO_240/246_5402     | 0.0015473 | 0.0016394 |
| IFA | HEMO_187_6503         | 0.0186528 | 0.005605  |
| IFA | HEMO_187_5402/5421    | 0.0904443 | 0.012613  |
| IFA | HEMO_187_5412/5431    | 0.0045839 | 0.0029389 |
| IFA | FETUA_346_1101        | 0.644887  | 0.1071992 |
| IFA | FETUA_346_2200        | 0.0021247 | 0.0012919 |
| IFA | FETUA_156_6411        | 0.0020513 | 0.0016073 |
| IFA | FETUA_156_5400        | 0.0080567 | 0.0056716 |
| IFA | FETUA_156_5401        | 0.0370009 | 0.0111281 |
| IFA | HEP2_49_5402          | 0.3926462 | 0.2115345 |
| IFA | FETUA_156_6410        | 0.0150072 | 0.0089408 |
| IFA | FETUA_156_6502        | 0.0262995 | 0.0097264 |

|        |                        |            |             |
|--------|------------------------|------------|-------------|
| IFA    | FETUA_156_5402/5421    | 0.4521056  | 0.0788971   |
| IFA    | FETUA_156_6503         | 0.0258202  | 0.0103454   |
| IFA    | FETUA_176_6501         | 0.0272377  | 0.0176713   |
| IFA    | HEP2_49_5412           | 0.019682   | 0.0158072   |
| IFA    | FETUA_156_6513         | 0.003414   | 0.0030239   |
| IFA    | HEMO_453_5420/5401     | 0.148944   | 0.0538416   |
| IFA    | FETUA_176_5401         | 0.0883577  | 0.033112    |
| IFA    | FETUA_176_6512         | 0.0063118  | 0.0036247   |
| IFA    | FETUA_176_6502         | 0.0114561  | 0.0050218   |
| IFA    | FETUA_176_6513         | 0.004584   | 0.0027493   |
| IFA    | FETUA_176_7600         | 0.0415096  | 0.0111661   |
| IFA    | FETUA_176_5412/5431    | 0.0213714  | 0.0057454   |
| IFA    | FETUA_176_5402/5421    | 0.1178337  | 0.0147793   |
| IFA    | FETUA_176_6503         | 0.0083317  | 0.00254     |
| IFA    | HEMO_453_5402/5421     | 0.1625453  | 0.0366154   |
| IFA    | LCAT_108_65030_z3      | 0.0146358  | 0.0045639   |
| IFA    | KNG1_205_6503          | 0.006725   | 0.0035589   |
| IFA    | KNG1_205_5402/5421     | 0.0035403  | 0.0019222   |
| IFA    | KNG1_205_6512          | 0.0069067  | 0.0081522   |
| IFA    | PON3_29_76030/76220_z3 | 0.2808948  | 0.491807    |
| IFA    | PON1_253_5402/5421     | 25.6158152 | 30.4351972  |
| IFA    | PON1_253_4301          | 21.5265258 | 29.3755552  |
| IFA    | PON1_253_54020_z3      | 12.2262258 | 18.6821024  |
| IFA    | PON1_253_43010_z3      | 184.797944 | 227.7171975 |
| IFA    | PON3_29_75310_z3       | 3.0430789  | 5.8493337   |
| IFA    | PON3_29_76210_z3       | 4.6268155  | 10.2021441  |
| IFA    | PON1_324_65030_z3      | 0.4699565  | 0.7920262   |
| IFA    | KNG1_169_5402          | 0.0027837  | 0.0033689   |
| IFA    | PON1_324_6502          | 49.4403839 | 63.8274665  |
| IFA    | PON1_324_5420          | 0.8756779  | 2.0658797   |
| IFA    | PON1_324_6501          | 3.9249468  | 6.3021571   |
| IFA    | SAA_94_55100_z3        | 0.0016891  | 0.0024032   |
| IFA    | SAA_94_54010_z3        | 0.007496   | 0.0089788   |
| IFA    | SAA_94_44010_z3        | 0.000459   | 0.0007009   |
| IFA    | SAA_94_53010_z3        | 0.0004467  | 0.0004924   |
| IFA    | SAA_94_43010_z3        | 0.0019437  | 0.0037609   |
| IFA    | SAA_94_54020_z3        | 0.0024335  | 0.004961    |
| SQ-LNS | APOB_3224_54020_z3     | 0.0360742  | 0.0205106   |
| SQ-LNS | APOB_3411_5401         | 0.0133048  | 0.031548    |
| SQ-LNS | AACT_271_6512          | 0.0092851  | 0.0111823   |
| SQ-LNS | AACT_271_7603          | 0.0433408  | 0.0328622   |
| SQ-LNS | AACT_271_7602          | 0.0565462  | 0.0307353   |
| SQ-LNS | AACT_271_6502          | 0.0037181  | 0.0036589   |

|        |                             |           |           |
|--------|-----------------------------|-----------|-----------|
| SQ-LNS | AACT_106_7603               | 0.0030077 | 0.0025984 |
| SQ-LNS | APOB_185_52000_z3           | 0.5967682 | 0.886622  |
| SQ-LNS | APOB_983_5401               | 0.0238097 | 0.013511  |
| SQ-LNS | AACT_106_7604               | 0.0006532 | 0.0010299 |
| SQ-LNS | A1BG_179_5421/5402          | 0.0187236 | 0.0051327 |
| SQ-LNS | APOB_983_54020_z4           | 0.042181  | 0.0188127 |
| SQ-LNS | AACT_127_5401               | 0.0019927 | 0.0020864 |
| SQ-LNS | AACT_127_8500               | 0.0503658 | 0.0478195 |
| SQ-LNS | A1AT_271_5412               | 0.0005837 | 0.0004937 |
| SQ-LNS | A1AT_271_5402               | 0.066594  | 0.0372713 |
| SQ-LNS | A1AT_271_55110_z3           | 0.0004226 | 0.000366  |
| SQ-LNS | A1AT_271_5401               | 0.0006625 | 0.0005339 |
| SQ-LNS | A1AT_271_6503               | 0.000254  | 0.0002328 |
| SQ-LNS | APOA2_35_11020_z3           | 0.0014228 | 0.0012092 |
| SQ-LNS | APOA2_35_11010_z2           | 0.0000171 | 0.0000361 |
| SQ-LNS | A1AT_271MC_5412             | 0.0045508 | 0.0033261 |
| SQ-LNS | A1AT_107_5401               | 0.0199933 | 0.013445  |
| SQ-LNS | A1AT_107_5411               | 0.0384509 | 0.0131449 |
| SQ-LNS | A1AT_271MC_5402             | 0.1519575 | 0.0496907 |
| SQ-LNS | A1AT_107_6512               | 0.011594  | 0.0086922 |
| SQ-LNS | A1AT_107_6502/6521          | 0.031491  | 0.0203581 |
| SQ-LNS | A1AT_107_5402               | 0.0766724 | 0.0333366 |
| SQ-LNS | A1AT_107_5412               | 0.0060377 | 0.0027078 |
| SQ-LNS | A1AT_107_6513               | 0.010431  | 0.0068266 |
| SQ-LNS | A1AT_107_6503               | 0.0316656 | 0.0147775 |
| SQ-LNS | A1AT_107_6501/6520          | 0.0030173 | 0.0066414 |
| SQ-LNS | APOA2_95_11010_z2           | 0.00039   | 0.0002525 |
| SQ-LNS | APOA2_88_11010_z2           | 0.0003228 | 0.0002112 |
| SQ-LNS | A1AT_70_5412                | 0.0008328 | 0.0004879 |
| SQ-LNS | A1AT_70_5402                | 0.0708743 | 0.0403989 |
| SQ-LNS | APOD_65_65210_z3            | 0.0000199 | 0.0000288 |
| SQ-LNS | APOD_65_65030_z3            | 0.0000452 | 0.0000455 |
| SQ-LNS | APOD_98_54100_z3            | 0.0011974 | 0.0018509 |
| SQ-LNS | APOD_98_54000_z3            | 0.0001162 | 0.0000727 |
| SQ-LNS | APOD_65_65020_z3            | 0.0000194 | 0.0000217 |
| SQ-LNS | APOD_65_65010_z3            | 0.0000266 | 0.0000301 |
| SQ-LNS | APOD_65_65020_z3_deamidated | 0.0002    | 0.0002207 |
| SQ-LNS | APOD_98_65010_z3            | 0.0000155 | 0.0000134 |
| SQ-LNS | APOD_98_65110_z3            | 0.0000361 | 0.0000263 |
| SQ-LNS | APOD_65_54010_z3            | 0.0000462 | 0.0000327 |
| SQ-LNS | APOD_98_54110_z3            | 0.0002055 | 0.0001553 |
| SQ-LNS | APOD_98_54020_z3            | 0.0000174 | 0.0000198 |
| SQ-LNS | APOD_98_54010_z3            | 0.0000901 | 0.0000841 |

|        |                             |           |           |
|--------|-----------------------------|-----------|-----------|
| SQ-LNS | APOD_65_54020_z3            | 0.000037  | 0.000028  |
| SQ-LNS | APOD_98_65130_z3            | 0.0000195 | 0.000026  |
| SQ-LNS | APOD_98_54120_z3            | 0.0000516 | 0.0000964 |
| SQ-LNS | APOD_65_76020_z3            | 0.0000268 | 0.0000183 |
| SQ-LNS | APOD_98_5402                | 0.0005348 | 0.0005597 |
| SQ-LNS | APOD_98_65320_z3            | 0.0000097 | 0.0000116 |
| SQ-LNS | APOD_65_54200_z3            | 0.000054  | 0.0000444 |
| SQ-LNS | APOD_65_76210_z3            | 0.0000289 | 0.0000282 |
| SQ-LNS | APOD_65_65030_z3_deamidated | 0.0000229 | 0.0000234 |
| SQ-LNS | APOD_98_6520                | 0.0001724 | 0.0001188 |
| SQ-LNS | APOD_98_6510                | 0.0003984 | 0.0003359 |
| SQ-LNS | APOD_98_9800                | 0.0004614 | 0.0012463 |
| SQ-LNS | APOD_98_6530                | 0.0005245 | 0.0005251 |
| SQ-LNS | APOD_98_7600                | 0.0002207 | 0.0002143 |
| SQ-LNS | APOC3_94AMC_12020_z3        | 0.0179115 | 0.038897  |
| SQ-LNS | APOC3_94AMC_22100_z3        | 0.0007987 | 0.0010032 |
| SQ-LNS | APOC3_94_1210               | 0.00149   | 0.0039736 |
| SQ-LNS | APOC3_94_0310               | 0.0009661 | 0.0016544 |
| SQ-LNS | APOC3_94_0300               | 0.0925521 | 0.0234368 |
| SQ-LNS | APOC3_94AMC_11000_z3        | 0.0043751 | 0.0017712 |
| SQ-LNS | APOC3_94MC_11010_z3         | 0.0230502 | 0.0090266 |
| SQ-LNS | APOC3_94A_11010_z2          | 0.0009175 | 0.0004671 |
| SQ-LNS | APOC3_94MC_1102             | 0.1548663 | 0.0333214 |
| SQ-LNS | APOC3_94MC_11020_z3         | 0.0102879 | 0.0059773 |
| SQ-LNS | APOC3_94_1101               | 0.1279492 | 0.0439271 |
| SQ-LNS | APOC3_94A_11000_z2          | 0.0006756 | 0.0006089 |
| SQ-LNS | APOC3_94Aoff_1101           | 0.0077636 | 0.0036551 |
| SQ-LNS | APOC3_94_2110               | 0.0006797 | 0.0013118 |
| SQ-LNS | APOC3_94Aoff_1102           | 0.0058798 | 0.0057642 |
| SQ-LNS | APOC3_94_1102               | 0.0984933 | 0.0272781 |
| SQ-LNS | APOC3_94A_11020_z2          | 0.0002145 | 0.000195  |
| SQ-LNS | APOC3_94_1111               | 0.0023424 | 0.0042113 |
| SQ-LNS | APOC3_94_1300               | 0.001765  | 0.0026773 |
| SQ-LNS | APOC3_94_1202               | 0.0051276 | 0.011014  |
| SQ-LNS | CLUS_291_5400               | 0.035016  | 0.0279911 |
| SQ-LNS | CLUS_291_6503               | 0.0125713 | 0.0202466 |
| SQ-LNS | CLUS_291_54020_z3           | 0.1369051 | 0.0434454 |
| SQ-LNS | CLUS_291_5421/5402          | 0.104943  | 0.0327815 |
| SQ-LNS | CLUS_291_5420/5401          | 0.0346106 | 0.0154522 |
| SQ-LNS | CLUS_86_6503                | 0.001432  | 0.0012173 |
| SQ-LNS | APOF_269_11010_z2           | 0.0911866 | 0.0614788 |
| SQ-LNS | APOF_273/274_11010_z3       | 2.2598937 | 0.5417472 |
| SQ-LNS | APOF_273/274_11020_z3       | 0.9932302 | 0.2866299 |



|        |                       |           |           |
|--------|-----------------------|-----------|-----------|
| SQ-LNS | APOE_307/308_11010_z3 | 0.0397624 | 0.0098877 |
| SQ-LNS | APOE_307/308_11010_z2 | 0.0011287 | 0.0003328 |
| SQ-LNS | CLUS_374_6520/6501    | 0.104148  | 0.0551642 |
| SQ-LNS | CLUS_374_5402/5421    | 0.10461   | 0.0369595 |
| SQ-LNS | APOE_215_11010_z2     | 0.0050296 | 0.0048735 |
| SQ-LNS | CLUS_374_5420/5401    | 1.3892337 | 0.6961809 |
| SQ-LNS | APOE_215_11020_z2     | 0.0016964 | 0.0019215 |
| SQ-LNS | CLUS_374_6512         | 0.108697  | 0.0527778 |
| SQ-LNS | CO3_85_6200           | 0.4928755 | 0.3060726 |
| SQ-LNS | CO3_85_5200           | 0.4637935 | 0.241497  |
| SQ-LNS | CO3_85_7200           | 0.1941483 | 0.1536028 |
| SQ-LNS | APOM_135_43010_z3     | 0.0006842 | 0.0002434 |
| SQ-LNS | APOM_135_54010_z3     | 0.0004338 | 0.0001095 |
| SQ-LNS | APOM_135_53010_z3     | 0.0001299 | 0.0000675 |
| SQ-LNS | CO3_85_6301           | 1.2139166 | 1.3940368 |
| SQ-LNS | APOM_135_54020_z3     | 0.0001889 | 0.0000913 |
| SQ-LNS | APOM_135_44010_z3     | 0.0000361 | 0.0000243 |
| SQ-LNS | APOM_135_55110_z3     | 0.0000398 | 0.0000249 |
| SQ-LNS | C1S_174_5402          | 0.0105521 | 0.0069264 |
| SQ-LNS | C1S_174_5401          | 0.0164874 | 0.0365968 |
| SQ-LNS | APOM_135_5421         | 0.0001364 | 0.00015   |
| SQ-LNS | APOM_135_8500         | 0.0000353 | 0.0000281 |
| SQ-LNS | HEMO_240/246_5402     | 0.0016205 | 0.0017465 |
| SQ-LNS | HEMO_187_6503         | 0.0192163 | 0.008273  |
| SQ-LNS | HEMO_187_5402/5421    | 0.0917258 | 0.0185436 |
| SQ-LNS | HEMO_187_5412/5431    | 0.0041695 | 0.0025208 |
| SQ-LNS | FETUA_346_1101        | 0.6826585 | 0.1214871 |
| SQ-LNS | FETUA_346_2200        | 0.0032741 | 0.0022572 |
| SQ-LNS | FETUA_156_6411        | 0.0030369 | 0.0025073 |
| SQ-LNS | FETUA_156_5400        | 0.0080833 | 0.0060188 |
| SQ-LNS | FETUA_156_5401        | 0.0379221 | 0.0163555 |
| SQ-LNS | HEP2_49_5402          | 0.3712908 | 0.2009065 |
| SQ-LNS | FETUA_156_6410        | 0.0223969 | 0.0145957 |
| SQ-LNS | FETUA_156_6502        | 0.0285029 | 0.0151165 |
| SQ-LNS | FETUA_156_5402/5421   | 0.4969865 | 0.1013284 |
| SQ-LNS | FETUA_156_6503        | 0.0296815 | 0.0133201 |
| SQ-LNS | FETUA_176_6501        | 0.0427938 | 0.0269402 |
| SQ-LNS | HEP2_49_5412          | 0.0324887 | 0.0298518 |
| SQ-LNS | FETUA_156_6513        | 0.005065  | 0.0039551 |
| SQ-LNS | HEMO_453_5420/5401    | 0.139898  | 0.0651389 |
| SQ-LNS | FETUA_176_5401        | 0.0796742 | 0.0377109 |
| SQ-LNS | FETUA_176_6512        | 0.0063726 | 0.0044113 |
| SQ-LNS | FETUA_176_6502        | 0.0115723 | 0.0068503 |

|        |                        |             |             |
|--------|------------------------|-------------|-------------|
| SQ-LNS | FETUA_176_6513         | 0.0048559   | 0.0024456   |
| SQ-LNS | FETUA_176_7600         | 0.0401939   | 0.0122964   |
| SQ-LNS | FETUA_176_5412/5431    | 0.0208814   | 0.0069375   |
| SQ-LNS | FETUA_176_5402/5421    | 0.1181136   | 0.0198114   |
| SQ-LNS | FETUA_176_6503         | 0.0084927   | 0.0030904   |
| SQ-LNS | HEMO_453_5402/5421     | 0.1609827   | 0.0477325   |
| SQ-LNS | LCAT_108_65030_z3      | 0.0154938   | 0.0044167   |
| SQ-LNS | KNG1_205_6503          | 0.0085932   | 0.0062304   |
| SQ-LNS | KNG1_205_5402/5421     | 0.0049045   | 0.003644    |
| SQ-LNS | KNG1_205_6512          | 0.007613    | 0.0088827   |
| SQ-LNS | PON3_29_76030/76220_z3 | 0.1891634   | 0.2198464   |
| SQ-LNS | PON1_253_5402/5421     | 22.9291195  | 22.2153279  |
| SQ-LNS | PON1_253_4301          | 17.7064821  | 21.8488609  |
| SQ-LNS | PON1_253_54020_z3      | 9.8524447   | 10.2595725  |
| SQ-LNS | PON1_253_43010_z3      | 180.4528761 | 223.2800303 |
| SQ-LNS | PON3_29_75310_z3       | 2.0986005   | 2.6136493   |
| SQ-LNS | PON3_29_76210_z3       | 2.9688579   | 4.9107168   |
| SQ-LNS | PON1_324_65030_z3      | 0.4423539   | 0.5318954   |
| SQ-LNS | KNG1_169_5402          | 0.004139    | 0.006088    |
| SQ-LNS | PON1_324_6502          | 44.6511212  | 61.8072691  |
| SQ-LNS | PON1_324_5420          | 0.718557    | 1.1075797   |
| SQ-LNS | PON1_324_6501          | 3.1246833   | 4.6988605   |
| SQ-LNS | SAA_94_55100_z3        | 0.0014148   | 0.0013801   |
| SQ-LNS | SAA_94_54010_z3        | 0.0061682   | 0.0056536   |
| SQ-LNS | SAA_94_44010_z3        | 0.0003726   | 0.0004328   |
| SQ-LNS | SAA_94_53010_z3        | 0.0005309   | 0.0005368   |
| SQ-LNS | SAA_94_43010_z3        | 0.0012074   | 0.0012706   |
| SQ-LNS | SAA_94_54020_z3        | 0.0020447   | 0.0020592   |

**Table S4.** Enrichment Analysis for glycopeptides in 21 HDL-associated proteins.

| Protein | N   | m  | Number Glycopeptide Increased in SQ-LNS | Number Glycopeptide Decreased in SQ-LNS | P value Increased | P value Decreased |
|---------|-----|----|-----------------------------------------|-----------------------------------------|-------------------|-------------------|
| A1AT    | 163 | 18 | 17                                      | 1                                       | <b>0.0001244</b>  | 1                 |
| FETUA   | 163 | 19 | 16                                      | 3                                       | <b>0.00393</b>    | 0.9994            |
| AACT    | 163 | 8  | 8                                       | 0                                       | <b>0.006192</b>   | 1                 |
| KNG1    | 163 | 4  | 4                                       | 0                                       | 0.08228           | 1                 |
| APOF    | 163 | 3  | 3                                       | 0                                       | 0.1549            | 1                 |
| APOM    | 163 | 8  | 6                                       | 2                                       | 0.1969            | 0.9479            |
| C1S     | 163 | 2  | 2                                       | 0                                       | 0.2899            | 1                 |
| APOA2   | 163 | 4  | 3                                       | 1                                       | 0.3727            | 0.9177            |
| A1BG    | 163 | 1  | 1                                       | 0                                       | 0.5399            | 1                 |
| LCAT    | 163 | 1  | 1                                       | 0                                       | 0.5399            | 1                 |
| HEMO    | 163 | 6  | 3                                       | 3                                       | 0.7315            | 0.5807            |
| APOE    | 163 | 4  | 2                                       | 2                                       | 0.7475            | 0.6273            |
| HEP2    | 163 | 2  | 1                                       | 1                                       | 0.7898            | 0.7101            |
| APOB    | 163 | 5  | 2                                       | 3                                       | 0.8622            | 0.4246            |
| APOD    | 163 | 27 | 12                                      | 15                                      | 0.9032            | 0.1899            |
| CO3     | 163 | 4  | 1                                       | 3                                       | 0.9571            | 0.2525            |
| SAA     | 163 | 6  | 1                                       | 5                                       | 0.9915            | 0.07248           |
| CLUS    | 163 | 10 | 1                                       | 9                                       | 0.9997            | <b>0.004316</b>   |
| APOC3   | 163 | 20 | 4                                       | 16                                      | 0.9998            | <b>0.001103</b>   |
| PON3    | 163 | 3  | 0                                       | 3                                       | 1                 | 0.0953            |
| PON1    | 163 | 8  | 0                                       | 8                                       | 1                 | <b>0.001625</b>   |

The enrichment analysis is done using the hypergeometric distribution. **N** is the total number of glycopeptides; **m** is the total number of glycopeptides of a particular protein; **Number Glycopeptide Increase in SQ-LNS** is the number of glycopeptides that are increased in the SQ-LNS group; **Number Glycopeptide Decrease in SQ-LNS** is the total number of glycopeptides that are decreased in SQ-LNS group (higher in the IFA group); **P value Increased** can be interpreted as the probability that having x number of glycopeptides increased in the SQ-LNS group is by chance; **P value Decreased** can be interpreted as the probability that having x number of glycopeptides decreased in the SQ-LNS group is by chance. SQ-LNS, small-quantity lipid-based nutrient supplements; IFA, iron and folic acid.

| <b>Table S5. HDL composition and function and growth association analysis.</b> |                                 |              |                       |                       |        |
|--------------------------------------------------------------------------------|---------------------------------|--------------|-----------------------|-----------------------|--------|
| <b>Predictor</b>                                                               | <b>Response</b>                 | <b>Model</b> | <b>95% CI</b>         | <b>Pval</b>           |        |
| <b>Cholesterol Efflux Capacity</b>                                             | HCZ18                           | Unadjusted   | (-4.89e-02, 6.90e-02) | 0.7358                |        |
|                                                                                |                                 | Adjusted     | (-4.53e-02, 6.76e-02) | 0.6957                |        |
|                                                                                | HCZ1812                         | Unadjusted   | (-3.10e-02, 2.85e-02) | 0.9345                |        |
|                                                                                |                                 | Adjusted     | (-3.40e-02, 2.39e-02) | 0.7289                |        |
|                                                                                | LAZ18                           | Unadjusted   | (-8.91e-02, 3.30e-02) | 0.3626                |        |
|                                                                                |                                 | Adjusted     | (-8.84e-02, 3.47e-02) | 0.3869                |        |
|                                                                                | LAZ1812                         | Unadjusted   | (-1.22e-02, 3.95e-02) | 0.2949                |        |
|                                                                                |                                 | Adjusted     | (-2.10e-02, 2.62e-02) | 0.8248                |        |
|                                                                                | WAZ18                           | Unadjusted   | (-9.71e-02, 2.92e-02) | 0.2884                |        |
|                                                                                |                                 | Adjusted     | (-9.71e-02, 2.92e-02) | 0.2884                |        |
|                                                                                | WAZ1812                         | Unadjusted   | (-2.29e-02, 3.60e-02) | 0.6567                |        |
|                                                                                |                                 | Adjusted     | (-2.90e-02, 1.96e-02) | 0.6988                |        |
|                                                                                | WLZ18                           | Unadjusted   | (-9.10e-02, 3.60e-02) | 0.3916                |        |
|                                                                                |                                 | Adjusted     | (-6.90e-02, 6.35e-02) | 0.9350                |        |
|                                                                                | WLZ1812                         | Unadjusted   | (-3.46e-02, 3.71e-02) | 0.9460                |        |
|                                                                                |                                 | Adjusted     | (-3.64e-02, 2.17e-02) | 0.6158                |        |
|                                                                                | <b>Surface/core lipid ratio</b> | HCZ18        | Unadjusted            | (-4.72e-01, 7.25e-01) | 0.6755 |
|                                                                                |                                 |              | Adjusted              | (-4.85e-01, 6.72e-01) | 0.7487 |
| HCZ1812                                                                        |                                 | Unadjusted   | (-3.67e-01, 2.47e-01) | 0.6973                |        |
|                                                                                |                                 | Adjusted     | (-3.46e-01, 2.60e-01) | 0.7774                |        |
| LAZ18                                                                          |                                 | Unadjusted   | (-1.06e+00, 1.77e-01) | 0.1598                |        |
|                                                                                |                                 | Adjusted     | (-1.03e+00, 2.10e-01) | 0.1921                |        |
| LAZ1812                                                                        |                                 | Unadjusted   | (-3.57e-01, 1.80e-01) | 0.5124                |        |
|                                                                                |                                 | Adjusted     | (-3.43e-01, 1.34e-01) | 0.3845                |        |
| WAZ18                                                                          |                                 | Unadjusted   | (-1.04e+00, 2.43e-01) | 0.2194                |        |
|                                                                                |                                 | Adjusted     | (-1.04e+00, 2.43e-01) | 0.2194                |        |
| WAZ1812                                                                        |                                 | Unadjusted   | (-5.06e-01, 9.57e-02) | 0.1782                |        |
|                                                                                |                                 | Adjusted     | (-4.37e-01, 5.36e-02) | 0.1235                |        |
| WLZ18                                                                          |                                 | Unadjusted   | (-9.19e-01, 3.75e-01) | 0.4054                |        |
|                                                                                |                                 | Adjusted     | (-9.92e-01, 3.08e-01) | 0.2975                |        |
| WLZ1812                                                                        |                                 | Unadjusted   | (-5.99e-01, 1.34e-01) | 0.2094                |        |
|                                                                                |                                 | Adjusted     | (-5.22e-01, 6.93e-02) | 0.1311                |        |
| <b>EOD<sub>18</sub></b>                                                        |                                 | HCZ18        | Unadjusted            | (-1.86e+00, 2.56e+00) | 0.7524 |
|                                                                                |                                 |              | Adjusted              | (-2.02e+00, 2.21e+00) | 0.9299 |
|                                                                                | HCZ1812                         | Unadjusted   | (-9.23e-02, 2.16e+00) | 0.0714                |        |
|                                                                                |                                 | Adjusted     | (-3.90e-01, 1.91e+00) | 0.1913                |        |
|                                                                                | LAZ18                           | Unadjusted   | (-3.01e+00, 1.64e+00) | 0.5600                |        |
|                                                                                |                                 | Adjusted     | (-2.71e+00, 2.03e+00) | 0.7776                |        |
|                                                                                | LAZ1812                         | Unadjusted   | (-2.44e-02, 1.97e+00) | 0.0557                |        |
|                                                                                |                                 | Adjusted     | (3.86e-02, 1.83e+00)  | 0.0412                |        |
|                                                                                | WAZ18                           | Unadjusted   | (-2.60e+00, 2.23e+00) | 0.8784                |        |

|              |         |            |                       |        |
|--------------|---------|------------|-----------------------|--------|
|              |         | Adjusted   | (-2.60e+00, 2.23e+00) | 0.8784 |
|              | WAZ1812 | Unadjusted | (-8.38e-01, 1.48e+00) | 0.5837 |
|              |         | Adjusted   | (-1.00e+00, 9.05e-01) | 0.9189 |
|              | WLZ18   | Unadjusted | (-2.26e+00, 2.58e+00) | 0.8940 |
|              |         | Adjusted   | (-1.46e+00, 3.60e+00) | 0.4026 |
|              | WLZ1812 | Unadjusted | (-1.57e+00, 1.25e+00) | 0.8232 |
|              |         | Adjusted   | (-1.59e+00, 7.12e-01) | 0.4495 |
| <b>ACL</b>   | HCZ18   | Unadjusted | (-4.74e-01, 4.64e-01) | 0.9825 |
|              |         | Adjusted   | (-3.28e-01, 5.82e-01) | 0.5802 |
|              | HCZ1812 | Unadjusted | (-3.42e-01, 1.53e-01) | 0.4496 |
|              |         | Adjusted   | (-3.33e-01, 1.70e-01) | 0.5202 |
|              | LAZ18   | Unadjusted | (-1.45e-01, 8.34e-01) | 0.1651 |
|              |         | Adjusted   | (-1.14e-01, 8.75e-01) | 0.1293 |
|              | LAZ1812 | Unadjusted | (-3.55e-01, 8.38e-02) | 0.2215 |
|              |         | Adjusted   | (-2.25e-01, 1.83e-01) | 0.8389 |
|              | WAZ18   | Unadjusted | (-3.83e-01, 6.43e-01) | 0.6160 |
|              |         | Adjusted   | (-3.83e-01, 6.43e-01) | 0.6160 |
|              | WAZ1812 | Unadjusted | (-4.19e-01, 7.77e-02) | 0.1751 |
|              |         | Adjusted   | (-2.60e-01, 1.55e-01) | 0.6161 |
|              | WLZ18   | Unadjusted | (-5.59e-01, 4.71e-01) | 0.8657 |
|              |         | Adjusted   | (-6.72e-01, 3.58e-01) | 0.5457 |
|              | WLZ1812 | Unadjusted | (-4.48e-01, 1.59e-01) | 0.3454 |
|              |         | Adjusted   | (-3.33e-01, 1.61e-01) | 0.4886 |
| <b>APOA1</b> | HCZ18   | Unadjusted | (-6.36e-08, 8.03e-07) | 0.0934 |
|              |         | Adjusted   | (-1.49e-07, 6.95e-07) | 0.2017 |
|              | HCZ1812 | Unadjusted | (-6.33e-08, 3.94e-07) | 0.1538 |
|              |         | Adjusted   | (-3.13e-08, 3.99e-07) | 0.0925 |
|              | LAZ18   | Unadjusted | (-2.29e-07, 6.79e-07) | 0.3267 |
|              |         | Adjusted   | (-1.23e-07, 7.60e-07) | 0.1544 |
|              | LAZ1812 | Unadjusted | (-1.43e-07, 2.59e-07) | 0.5680 |
|              |         | Adjusted   | (-7.87e-08, 2.80e-07) | 0.2664 |
|              | WAZ18   | Unadjusted | (-2.99e-07, 6.45e-07) | 0.4685 |
|              |         | Adjusted   | (-2.99e-07, 6.45e-07) | 0.4685 |
|              | WAZ1812 | Unadjusted | (5.04e-08, 4.89e-07)  | 0.0166 |
|              |         | Adjusted   | (-2.47e-09, 3.80e-07) | 0.0529 |
|              | WLZ18   | Unadjusted | (-3.85e-07, 5.65e-07) | 0.7067 |
|              |         | Adjusted   | (-2.37e-07, 7.16e-07) | 0.3199 |
|              | WLZ1812 | Unadjusted | (8.43e-08, 6.14e-07)  | 0.0105 |
|              |         | Adjusted   | (-2.08e-08, 4.46e-07) | 0.0735 |
| <b>SAA1</b>  | HCZ18   | Unadjusted | (-4.10e-05, 3.68e-05) | 0.9161 |
|              |         | Adjusted   | (-5.13e-05, 2.42e-05) | 0.4770 |
|              | HCZ1812 | Unadjusted | (-5.36e-06, 3.53e-05) | 0.1462 |
|              |         | Adjusted   | (-7.29e-06, 3.30e-05) | 0.2070 |
|              | LAZ18   | Unadjusted | (-5.52e-05, 2.43e-05) | 0.4404 |

|              |         |            |                       |        |
|--------------|---------|------------|-----------------------|--------|
|              |         | Adjusted   | (-4.99e-05, 3.14e-05) | 0.6524 |
|              | LAZ1812 | Unadjusted | (-1.25e-05, 2.30e-05) | 0.5547 |
|              |         | Adjusted   | (-1.74e-05, 1.48e-05) | 0.8703 |
|              | WAZ18   | Unadjusted | (-5.74e-05, 2.49e-05) | 0.4342 |
|              |         | Adjusted   | (-5.74e-05, 2.49e-05) | 0.4342 |
|              | WAZ1812 | Unadjusted | (1.70e-05, 5.36e-05)  | 0.0003 |
|              |         | Adjusted   | (5.13e-06, 3.88e-05)  | 0.0114 |
|              | WLZ18   | Unadjusted | (-5.30e-05, 2.97e-05) | 0.5770 |
|              |         | Adjusted   | (-4.36e-05, 3.94e-05) | 0.9208 |
|              | WLZ1812 | Unadjusted | (2.53e-05, 6.88e-05)  | 0.0001 |
|              |         | Adjusted   | (1.26e-05, 5.17e-05)  | 0.0017 |
| <b>SAA2</b>  | HCZ18   | Unadjusted | (-2.49e-05, 2.27e-05) | 0.9242 |
|              |         | Adjusted   | (-3.31e-05, 1.35e-05) | 0.4060 |
|              | HCZ1812 | Unadjusted | (-1.90e-06, 2.30e-05) | 0.0953 |
|              |         | Adjusted   | (-2.40e-06, 2.23e-05) | 0.1123 |
|              | LAZ18   | Unadjusted | (-3.24e-05, 1.60e-05) | 0.5012 |
|              |         | Adjusted   | (-3.13e-05, 1.76e-05) | 0.5774 |
|              | LAZ1812 | Unadjusted | (-8.29e-06, 1.34e-05) | 0.6386 |
|              |         | Adjusted   | (-9.72e-06, 9.74e-06) | 0.9983 |
|              | WAZ18   | Unadjusted | (-3.68e-05, 1.32e-05) | 0.3507 |
|              |         | Adjusted   | (-3.68e-05, 1.32e-05) | 0.3507 |
|              | WAZ1812 | Unadjusted | (1.16e-05, 3.37e-05)  | 0.0001 |
|              |         | Adjusted   | (4.44e-06, 2.45e-05)  | 0.0054 |
|              | WLZ18   | Unadjusted | (-3.56e-05, 1.47e-05) | 0.4094 |
|              |         | Adjusted   | (-2.91e-05, 2.17e-05) | 0.7722 |
|              | WLZ1812 | Unadjusted | (1.77e-05, 4.38e-05)  | 0.0000 |
|              |         | Adjusted   | (8.88e-06, 3.27e-05)  | 0.0009 |
| <b>APOL1</b> | HCZ18   | Unadjusted | (-3.19e-05, 2.56e-05) | 0.8278 |
|              |         | Adjusted   | (-3.56e-05, 1.96e-05) | 0.5676 |
|              | HCZ1812 | Unadjusted | (1.12e-06, 2.98e-05)  | 0.0350 |
|              |         | Adjusted   | (-2.17e-06, 2.61e-05) | 0.0957 |
|              | LAZ18   | Unadjusted | (-4.23e-05, 1.81e-05) | 0.4278 |
|              |         | Adjusted   | (-3.74e-05, 2.27e-05) | 0.6274 |
|              | LAZ1812 | Unadjusted | (-8.61e-06, 1.77e-05) | 0.4933 |
|              |         | Adjusted   | (-1.23e-05, 1.16e-05) | 0.9510 |
|              | WAZ18   | Unadjusted | (-3.09e-05, 3.19e-05) | 0.9754 |
|              |         | Adjusted   | (-3.09e-05, 3.19e-05) | 0.9754 |
|              | WAZ1812 | Unadjusted | (1.21e-05, 3.93e-05)  | 0.0004 |
|              |         | Adjusted   | (6.56e-06, 3.02e-05)  | 0.0028 |
|              | WLZ18   | Unadjusted | (-2.24e-05, 4.05e-05) | 0.5678 |
|              |         | Adjusted   | (-2.00e-05, 4.26e-05) | 0.4738 |
|              | WLZ1812 | Unadjusted | (1.65e-05, 4.92e-05)  | 0.0002 |
|              |         | Adjusted   | (1.23e-05, 3.97e-05)  | 0.0003 |

ACL, average chain length; APOA1, apolipoprotein A-I; APOL1, apolipoprotein L1; CEC, cholesterol efflux capacity; EOD18, equivalent of double bond per 18 carbon; SAA1, serum amyloid A-1; SAA2, serum amyloid A-2; HCZ, head circumference for age z-score; LAZ, length for age z-score; WAZ, weight for age z-score; WLZ, weight for length z-score; 18, at 18 mo; 1812, changes in growth from 12 to 18 mo.

| <b>Table S6.</b> Composition of supplements |     |        |
|---------------------------------------------|-----|--------|
| Nutrient                                    | IFA | SQ-LNS |
| Ration, g/d                                 |     | 20     |
| Total energy, kcal                          |     | 118    |
| Protein, g                                  |     | 2.6    |
| Fat, g                                      |     | 10     |
| Linoleic acid, g                            |     | 4.59   |
| $\alpha$ -Linolenic acid, g                 |     | 0.59   |
| Vitamin A, $\mu$ g RE                       |     | 800    |
| Vitamin C, mg                               |     | 100    |
| Vitamin B-1, mg                             |     | 2.8    |
| Vitamin B-2, mg                             |     | 2.8    |
| Niacin, mg                                  |     | 36     |
| Folic acid, $\mu$ g                         | 400 | 400    |
| Pantothenic acid, mg                        |     | 7      |
| Vitamin B-6, mg                             |     | 3.8    |
| Vitamin B-12, $\mu$ g                       |     | 5.2    |
| Vitamin D, IU                               |     | 400    |
| Vitamin E, mg                               |     | 20     |
| Vitamin K, $\mu$ g                          |     | 45     |
| Iron, mg                                    | 60  | 20     |
| Zinc, mg                                    |     | 30     |
| Copper, mg                                  |     | 4      |
| Calcium, mg                                 |     | 280    |
| Phosphorus, mg                              |     | 190    |
| Potassium, mg                               |     | 200    |
| Magnesium, mg                               |     | 65     |
| Selenium, $\mu$ g                           |     | 130    |
| Iodine, $\mu$ g                             |     | 250    |
| Manganese, mg                               |     | 2.6    |

IFA, iron and folic acid; SQ-LNS, small-quantity lipid-based nutrient supplements



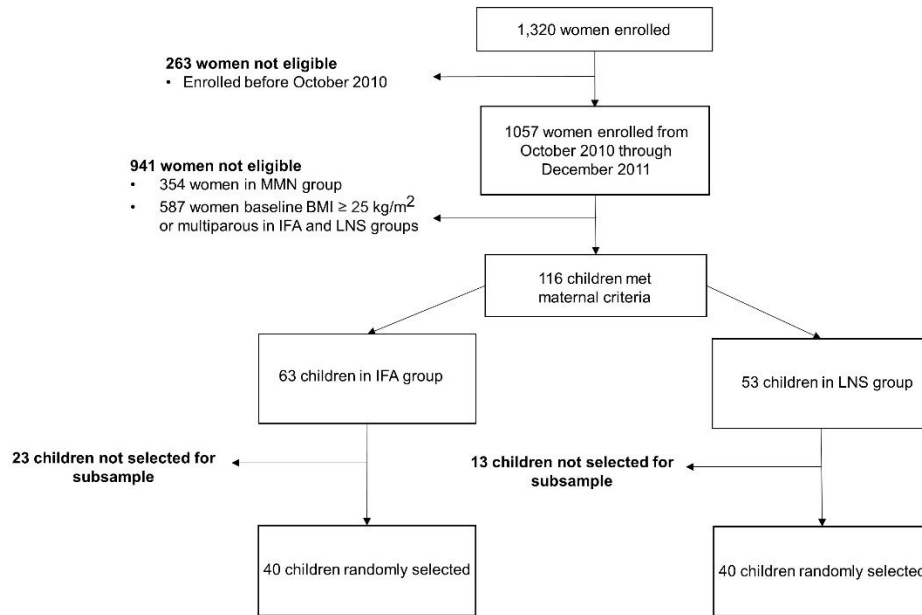

**Supporting Information Figure S1.** Flowchart of study profile

## **Supporting Information Method 1:**

### **HDL Protein and Glycoprotein Identification**

Isolated HDL fractions were diluted in a total of 100  $\mu$ L with 50 mM ammonium bicarbonate buffer at pH 7.5. All reagents used for sample preparation were freshly prepared in a buffer of 50 mM ammonium bicarbonate. Proteins were then denatured with 2  $\mu$ L of 550 mM dithiothreitol (Promega, Madison, WI) for 1 h at 65°C and alkylated with 4  $\mu$ L of 450 mM iodoacetamide (Sigma-Aldrich, St. Louis, MO) for 30 min at room temperature away from light. Proteins were digested with 2  $\mu$ g sequencing grade trypsin (Promega) for 18 h at 37°C. Samples were purified through Bond Elut C18 solid-phase extraction (Agilent, Santa Clara, CA), dried in a vacuum concentrator and reconstituted in 50  $\mu$ L LC-MS grade water.

Samples were run on an Agilent 1290 Infinity II High-Performance Liquid Chromatography (HPLC) coupled to a Fusion Lumos MS/MS Orbitrap (Thermo Fisher Scientific). The HPLC was equipped with a 150 mm Agilent Zorbax Eclipse Plus C18 column with 1.8  $\mu$ m particle size. Peptides and glycopeptides were eluted with a binary gradient of (A) 3% acetonitrile with 0.1% formic acid in water, and (B) 90% acetonitrile with 0.1% formic acid in water. The HPLC was set at a flow rate of 0.3 mL/min and programmed to ramp from 0% to 20% B in 20 min, 30% at 40 min, 44% at 47 min, and 100% at 48 min followed by a flushing and equilibration cycle. The electrospray ionization (ESI) voltage was set to 3500 V in the positive mode.

The Orbitrap was operated in positive mode with a precursor scan resolution of 60,000 and a range of 350-2000 m/z. Fragmentation was accomplished by stepped High-energy Collisional Dissociation (HCD). The collision energy was set at 30% and stepped at 10%. Ions for fragmentation were filtered to include a precursor mass range of 700-2000 m/z and charge states between 2-6.

Peptides and glycopeptides were identified with Byonic software (Protein Metrics Inc) from the Orbitrap MS data. For glycopeptide identification, a database of protein sequences and a library of glycan compositions are required as inputs. The human proteome database was

downloaded from Uniprot.org. We used in-house libraries for N-glycan and O-glycan compositions. (Glyco)peptides were identified based on the accurate mass of the precursor ions with tolerance set at 10 ppm and by matching MS/MS fragmentation with theoretical MS/MS spectra generated from in silico digestion of the provided protein database.

A total of 33 HDL-associated proteins were monitored in this study including apolipoprotein A-I (APOA1), apolipoprotein(a) (LPA), apolipoprotein A-II (APOA2), apolipoprotein A-IV (APOA4), apolipoprotein A-V (APOA5), apolipoprotein C-II (APOC2), apolipoprotein C-IV (APOC4), apolipoprotein F (APOF), apolipoprotein L1 (APOL1), haptoglobin-related protein (HPR), phosphatidylcholine-sterol acyltransferase (LCAT), phospholipid transfer protein (PLTP), alpha-1-antitrypsin (A1AT), alpha-1B-glycoprotein (A1BG), alpha-1-antichymotrypsin (AACT), apolipoprotein B-100 (APOB100), apolipoprotein C-I (APOC1), apolipoprotein C-III (APOC3), apolipoprotein D (APOD), apolipoprotein E (APOE), beta-2-glycoprotein 1 (APOH), apolipoprotein M (APOM), complement C1s subcomponent (C1S), clusterin (CLUS or APOJ), complement C3 (C3), alpha-2-HS-glycoprotein (FETUA or AHSB), hemopexin (HPX), heparin cofactor 2 (HCF2), kininogen-1 (KNG1), serum paraoxonase/arylesterase 1 (PON1), serum amyloid A-4 (SAA4) , serum amyloid A-1 (SAA1) , serum amyloid A-2 (SAA2).

## **Supporting Information Method 2:**

### **Targeted glycoproteomics analysis**

Tryptic digestion of the HDL samples was done in a 96-well format to facilitate batch processing. Samples were randomized before plating. All reagents were freshly prepared in a buffer of 50 mM ammonium bicarbonate. A sample volume of 10  $\mu$ L purified HDL was used for tryptic digestion. After every 20 samples, 10  $\mu$ L of commercially available human serum (Sigma-Aldrich) was also digested to serve as sample preparation controls. Protein standards (APOA1, APOC1, APOD, APOE, CLUS; all from Sigma-Aldrich) were mixed in known amounts (250, 250, 125, 200, and 125  $\mu$ g/mL, respectively) and digested with the batch to serve as calibration standards. Serial dilution of the digested protein mixture provided the calibration curve for absolute quantitation of the 5 proteins. The digested mixture was diluted by factors of 160, 80, 40, 20, 16, 8, 4, 2, and 1 to obtain 9 calibration standards, from which calibration curves spanning 4 orders of magnitude were calculated.

After pipetting the samples, controls, and standards onto the 96-well plate, 10  $\mu$ L of 100 mM dithiothreitol was added to each well to reduce the protein disulfide bonds. Protein denaturation was continued by heating in a water bath for 1 h at 65°C. Samples were then alkylated with 5  $\mu$ L of 360 mM iodoacetamide for 30 min at room temperature away from light. Excess iodoacetamide was quenched with 5  $\mu$ L of 100 mM dithiothreitol. Proteins were digested with 10  $\mu$ L of 200  $\mu$ g/mL sequencing grade trypsin for 18 h at 37°C. The digestion was stopped by acidifying the solution with 5  $\mu$ L 10% (v/v) formic acid (Fluka). To account for batch variability and possible run-order effects, 5  $\mu$ L of a 1  $\mu$ g/mL synthetic peptide with sequence RPAIAINNPYVPR (Bionexus, Oakland, CA) was added as an internal standard. The final volume of the HDL digest is 50  $\mu$ L, a 5-fold dilution of the purified HDL solution. The samples were injected into the LC-MS instrument without further cleanup.

(Glyco)peptides were quantified on an Agilent 1290 Infinity II LC system coupled to an Agilent 6495B Triple Quadrupole MS. Injection volumes were set at 5  $\mu$ L for protein standards

and HDL samples, and 1  $\mu$ L for serum digests. A pooled sample of the digested serum was run after every 10 HDL samples to serve as quality control (QC). They were used to monitor the stability of the instrument and the reproducibility of the batch analysis.

The HPLC was equipped with a 150 mm Agilent Zorbax Eclipse Plus C18 column with 1.8  $\mu$ m particle size. A C18 column guard was used to protect the column from the buildup of lipids and other hydrophobic substances in the sample. A binary gradient of (A) 3% acetonitrile with 0.1% formic acid in water and (B) 90% acetonitrile with 0.1% formic acid in water was set at a flow rate of 0.5 mL/min. The HPLC pump parameters were programmed to ramp from 0% to 20% B in 20 min, 30% at 40 min, 44% at 47 min, and 100% at 48 min followed by 12 min column flushing cycle with 100% B and 7 min equilibration at 100% A. The Electrospray Ionization (ESI) voltage was set to 3500 V in the positive mode.

A transition list for target analytes was created by combining previously reported transitions (25,26) with new transitions selected from the Orbitrap analysis. The transition list included 47 peptides and 163 glycopeptides from 33 proteins. The instrument was run on Dynamic Multiple Reaction Monitoring (DMRM) mode to minimize the number of transitions being monitored at each scan cycle. For peptides, at least 2 product ions were selected for monitoring. Quantitation was based on the area of the more abundant product ion while the others are for qualitative identification. Product ions for glycopeptides were based on diagnostic glycan fragments. Glycans yield characteristic oxonium ions after Collision Induced Dissociation (CID) with mass-to-charge ratios ( $m/z$ ) of 204.08, 274.09, and 366.14 for N-acetylhexosamine (HexNAc), N-acetylneuraminic acid (NeuAc) with loss of H<sub>2</sub>O, and hexose + HexNAc (Hex1HexNAc1) respectively.
